# Supplementary material for: Catalytic value addition of glycerol to lactic acid by chromium chloride and its corresponding pincer complex
Source: Royal Society of Chemistry journal article supplement (doi:10.1039/d5cy01041a), 2025-01-01
Supplement: d5cy01041a1.pdf [file d5cy01041a1.pdf]

# Supporting Information

## Catalytic Value Addition of Glycerol to Lactic Acid by Chromium Chloride and its Corresponding Pincer Complex

Himani Narjinari<sup>a</sup>, Sunil Dhole<sup>b</sup>, Akshai Kumar<sup>\*a,c</sup>

<sup>a</sup>Department of Chemistry, Indian Institute of Technology Guwahati, Guwahati – 781039, Assam, India

<sup>b</sup>ChemDist Group of Companies, Plot No 114 A, Sector 7, PCNTDA Bhosari Pune – 411026, Maharashtra, Indian

<sup>c</sup>Center for Nanotechnology, Indian Institute of Technology Guwahati, Guwahati – 781039, Assam, India

| Table of Contents |                                     | Page   |
|-------------------|-------------------------------------|--------|
| 1                 | X-ray analysis: Table S1            | S2     |
| 2                 | Representative GC Spectra           | S3-S6  |
| 3                 | HRMS simulation                     | S6-S7  |
| 4                 | NMR spectra of the reaction mixture | S8-S36 |
| 5                 | Kinetic study                       | S37    |

## 1.X-Ray Analysis

Justification of alert observed in the check\_cif file of **5a**.

### ALERT level A

The value of  $\sin(\theta_{\max})/\lambda$  is less than 0.550

Calculated  $\sin(\theta_{\max})/\lambda = 0.4523$

### Author Response

This error arises due to the weak diffraction of the crystal even when the crystal data was collected up to 0.78 Å resolution owing to the small size. Multiple attempts were made but crystal diffracted weakly. Multiple attempts to crystallise was also unsuccessful.

**Table S1. Crystal structure and refinement parameters of 5a**

|                                             |                                                                  |
|---------------------------------------------|------------------------------------------------------------------|
| Empirical formula                           | C <sub>19</sub> H <sub>15</sub> Cl <sub>3</sub> CrN <sub>3</sub> |
| Formula weight                              | 443.70                                                           |
| Temperature/K                               | 296.00                                                           |
| Crystal system                              | monoclinic                                                       |
| Space group                                 | P2 <sub>1</sub> /n                                               |
| a/Å                                         | 15.800(6)                                                        |
| b/Å                                         | 8.357(3)                                                         |
| c/Å                                         | 16.344(6)                                                        |
| α/°                                         | 90                                                               |
| β/°                                         | 103.866(10)                                                      |
| γ/°                                         | 90                                                               |
| Volume/Å <sup>3</sup>                       | 2095.2(12)                                                       |
| Z                                           | 4                                                                |
| ρ <sub>calc</sub> /g/cm <sup>3</sup>        | 1.464                                                            |
| μ/mm <sup>-1</sup>                          | 0.942                                                            |
| F(000)                                      | 940.0                                                            |
| Crystal size/mm <sup>3</sup>                | 0.18 × 0.14 × 0.12                                               |
| Radiation                                   | MoKα (λ = 0.71073)                                               |
| 2θ range for data collection/°              | 4.112 to 37.506                                                  |
| Index ranges                                | -14 ≤ h ≤ 14, -7 ≤ k ≤ 7, -14 ≤ l ≤ 14                           |
| Reflections collected                       | 24605                                                            |
| Independent reflections                     | 1615 [R <sub>int</sub> = 0.1150, R <sub>sigma</sub> = 0.0500]    |
| Data/restraints/parameters                  | 1615/225/235                                                     |
| Goodness-of-fit on F <sup>2</sup>           | 1.223                                                            |
| Final R indexes [I > 2σ (I)]                | R <sub>1</sub> = 0.0761, wR <sub>2</sub> = 0.1220                |
| Final R indexes [all data]                  | R <sub>1</sub> = 0.1029, wR <sub>2</sub> = 0.1337                |
| Largest diff. peak/hole / e Å <sup>-3</sup> | 0.36/-0.30                                                       |

## 2. Representative GC Spectra

GC analysis (TCD detection) was performed on a Agilent 7820-GC instrument fitted with Agilent Front SS7 inlet N2 HP-PLOT Q column (30 m length x 530  $\mu\text{m}$  x 40  $\mu\text{m}$  ID) using the following method:

Agilent 7820-GC Detector TCD

starting temperature 40 °C

Oven temperature 70 °C

Time at starting temp: 0 min

Hold time = 5 min

Ramp : 40 °C/min up to 250 °C

Flow rate (carrier): 25 mL/min (N<sub>2</sub>)

Split ratio: 195

Inlet temperature: 40 °C

Detector temperature: TCD: 250 °C

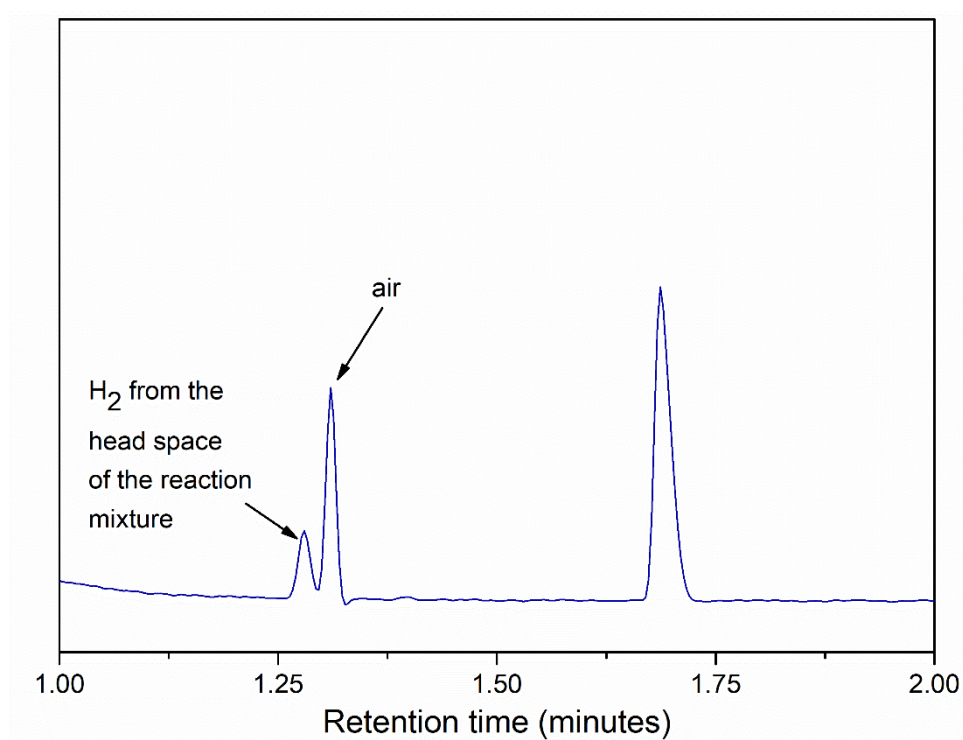

**Figure S1a.** GC data of the head space of glycerol (**1**) transfer dehydrogenation to lactate catalyzed by 0.5 mol% CrCl<sub>3</sub>·6H<sub>2</sub>O, 1.1 equivalent KOH, at 160 °C. (entry 4, Table 1).

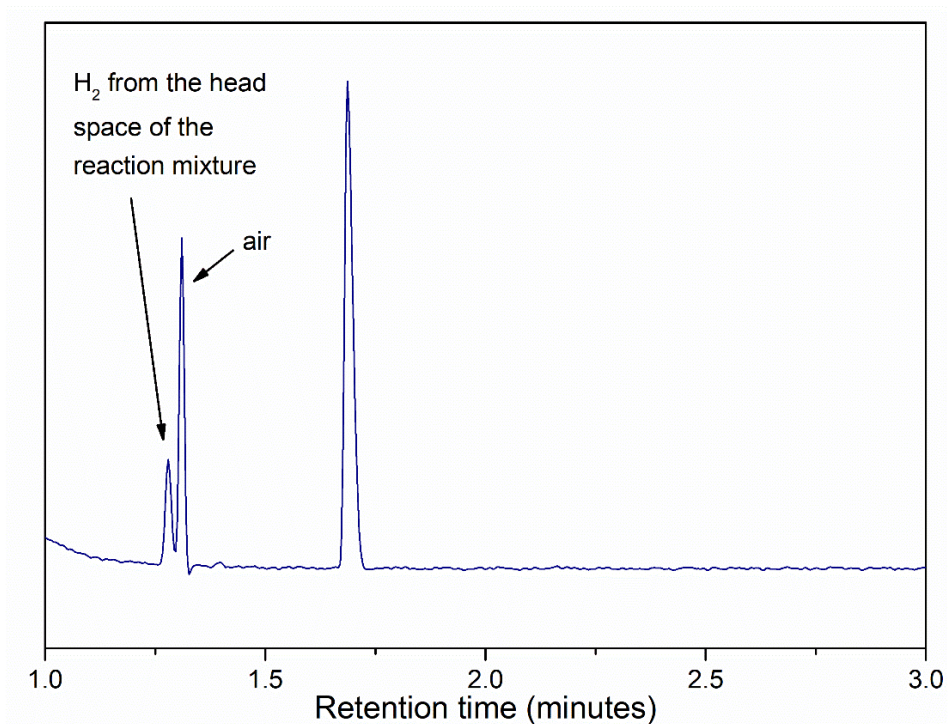

**Figure S1b.** GC data of the head space of glycerol (**1**) transfer dehydrogenation to lactate catalyzed by 0.5 mol% **5b**, 1.1 equivalent NaOH, at 160 °C. (entry 28, Table 1).

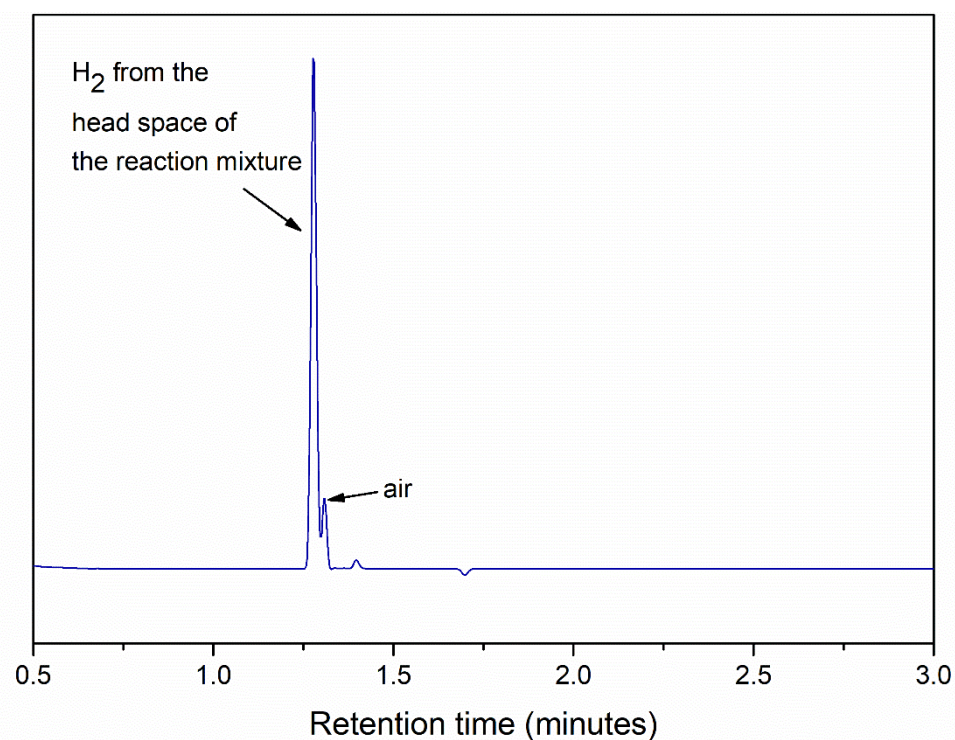

**Figure S1c.** GC data of the head space of glycerol (**1**) transfer dehydrogenation to lactate catalyzed by 0.75 mol% **5b**, 1.1 equivalent NaOH, at 160 °C. (entry 31, Table 1).

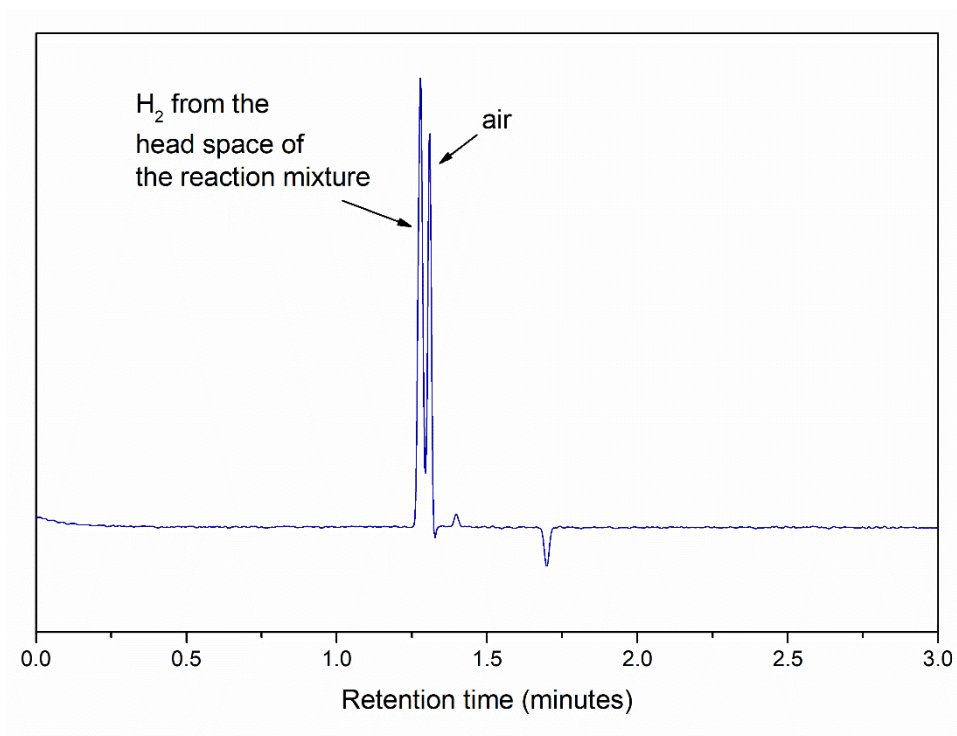

**Figure S1d.** GC data of the head space of glycerol (**1**) transfer dehydrogenation to lactate catalyzed by 0.25 mol% **5b**, 1.1 equivalent NaOH, at 160 °C. (entry 32, Table 1).

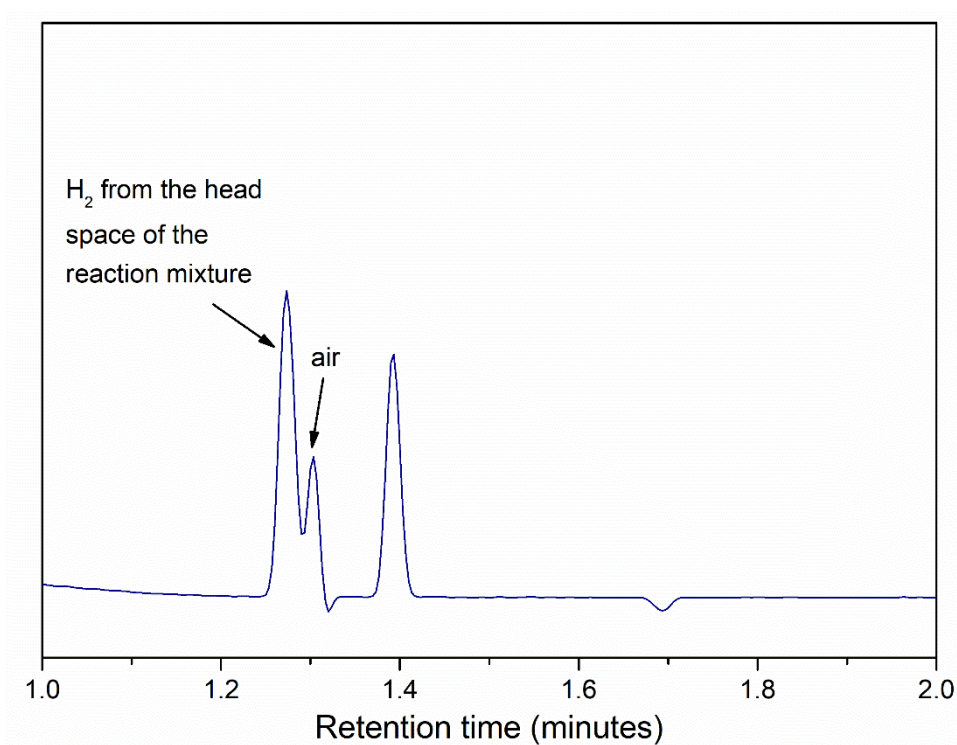

**Figure S1e.** GC data of the head space of glycerol (**1**) transfer dehydrogenation to lactate catalyzed by 0.05 mol% **5b**, 1.1 equivalent NaOH, at 160 °C. (entry 33, Table 1).



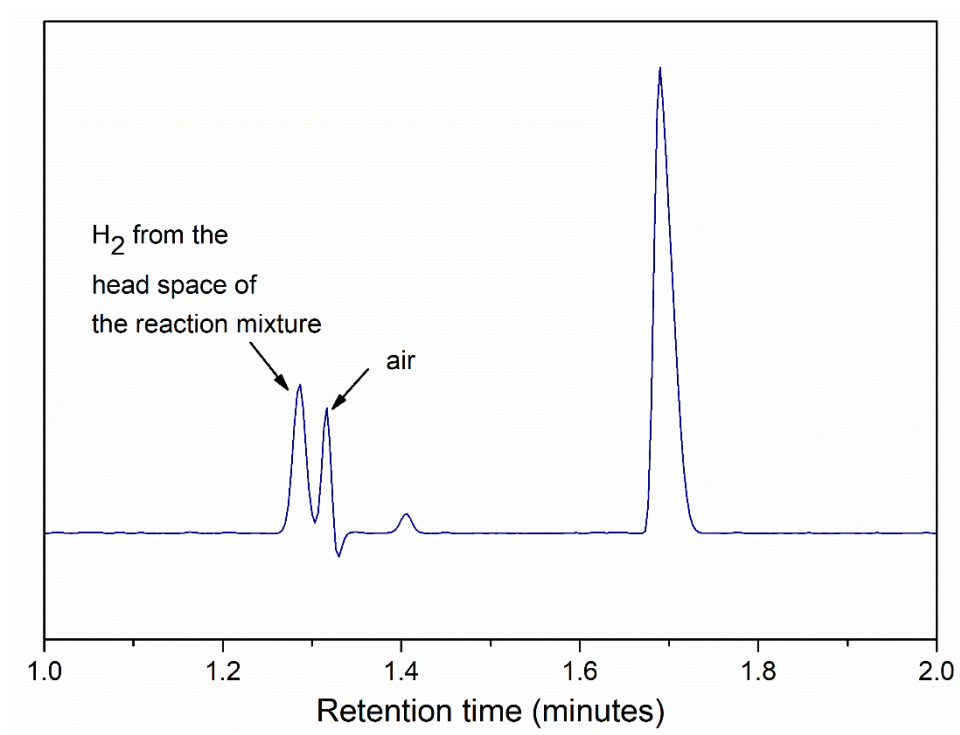

**Figure S1f.** GC data of the head space of glycerol (**1**) transfer dehydrogenation to lactate catalyzed by 0.005 mol% **5b**, 1.1 equivalent NaOH, at 160 °C. (entry 34, Table 1).

### 3. HRMS simulation

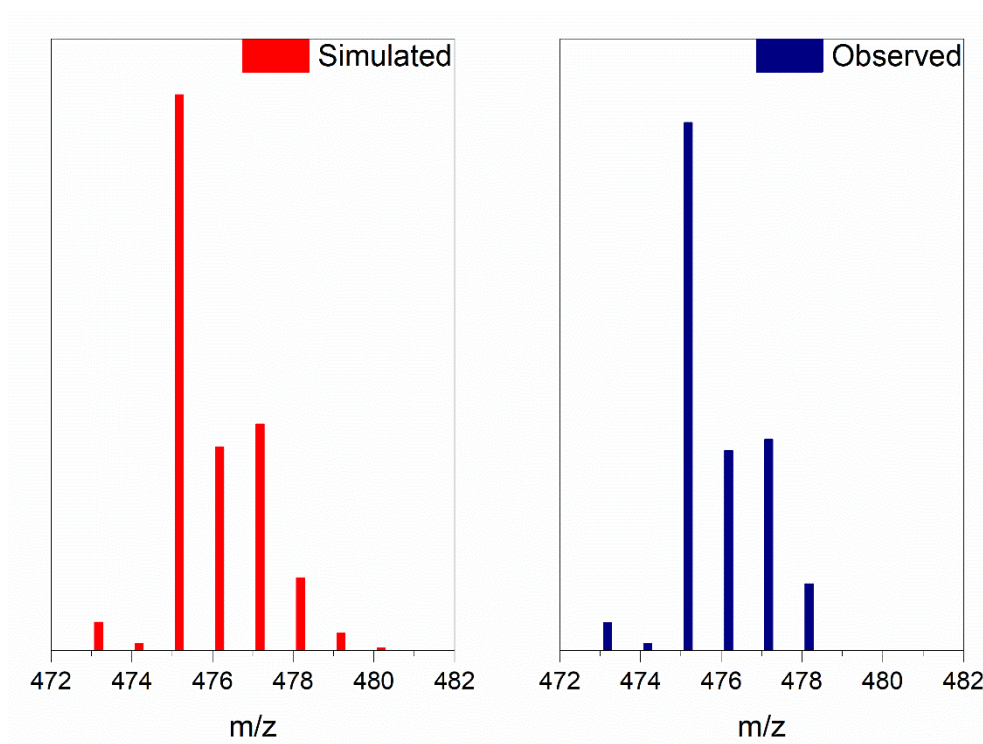

**Figure S2a:** HRMS(ESI) expanded spectrum of m/z 475.3254 : Simulated (red) and observed (blue).

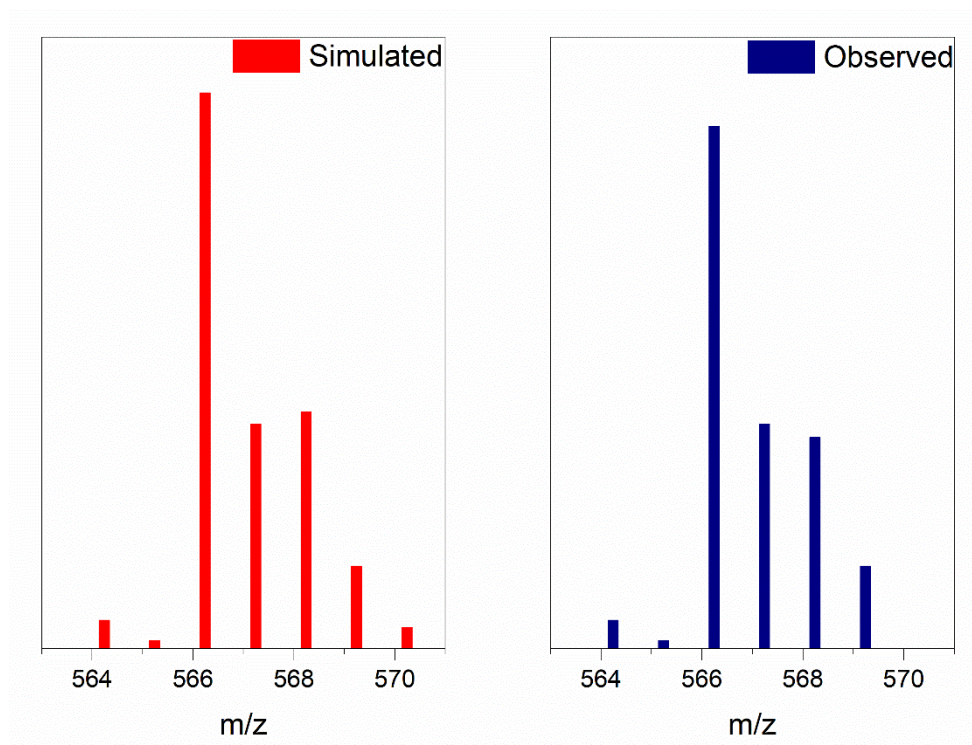

**Figure S2b:** HRMS(ESI) expanded spectrum of m/z 566.8870: Simulated (red) and observed (blue).

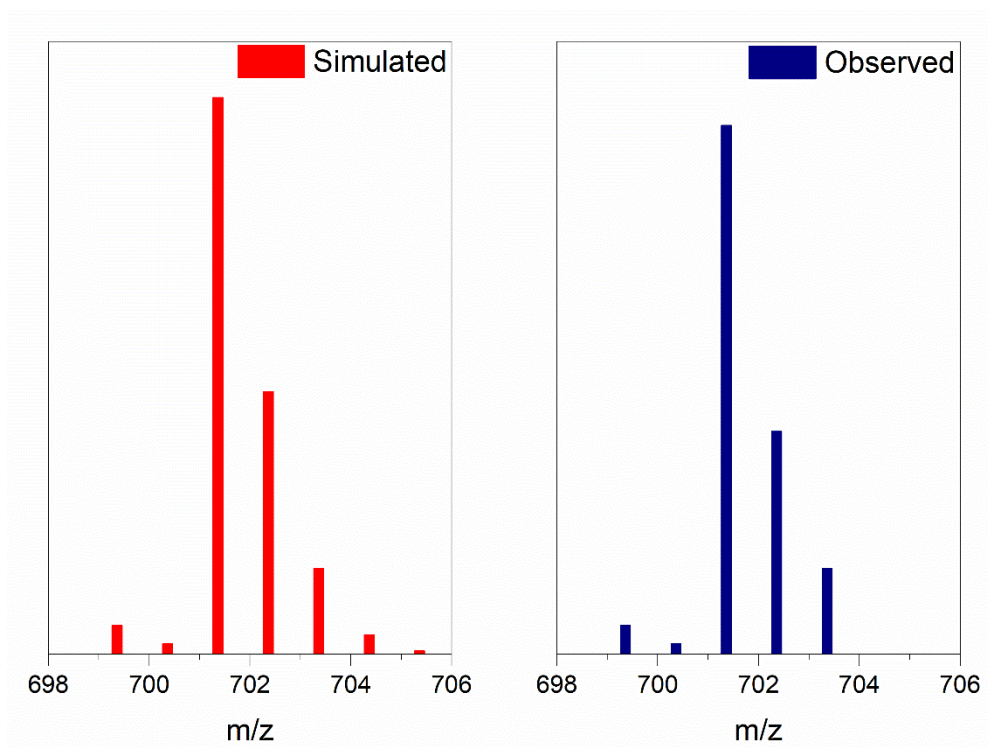

**Figure S2c:** HRMS(ESI) expanded spectrum of m/z 701.4891: Simulated (red) and observed (blue).

#### 4. NMR spectra of crude reaction mixture

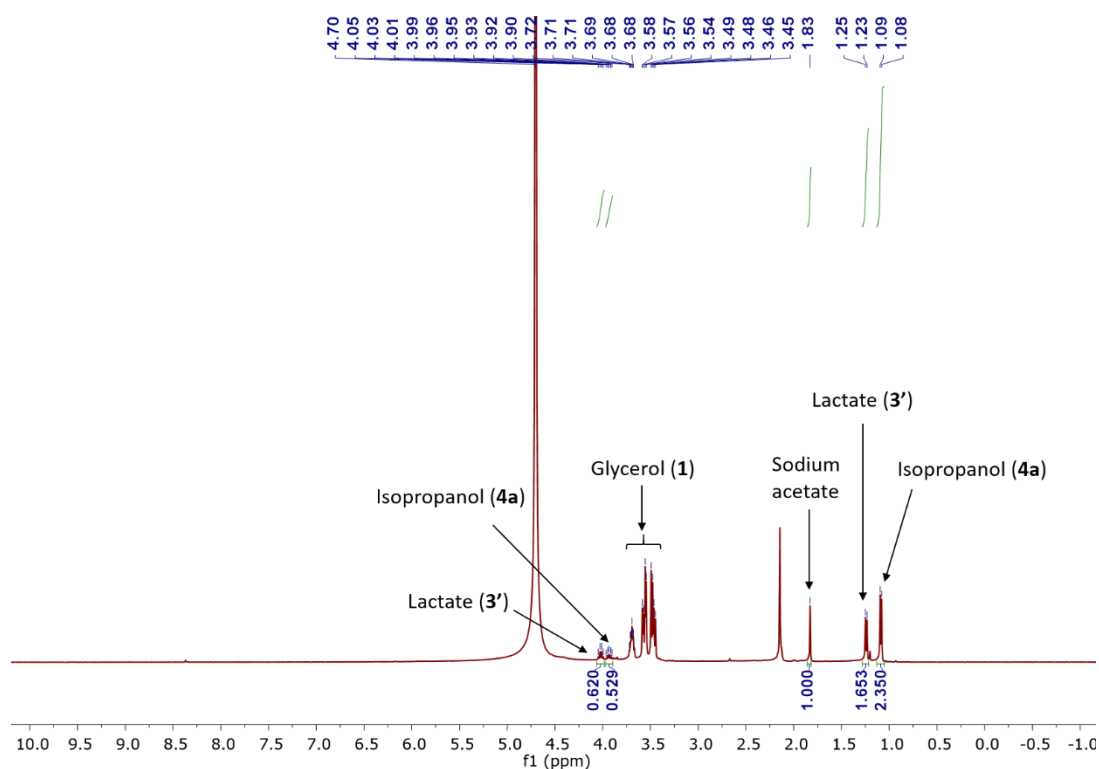

**Figure S3:** <sup>1</sup>H NMR spectra of glycerol (**1**) transfer dehydrogenation to lactate catalyzed by 0.5 mol% CrCl<sub>3</sub>·6H<sub>2</sub>O, 0.5 equivalents KOH, at 160 °C. (entry 1, Table 1).

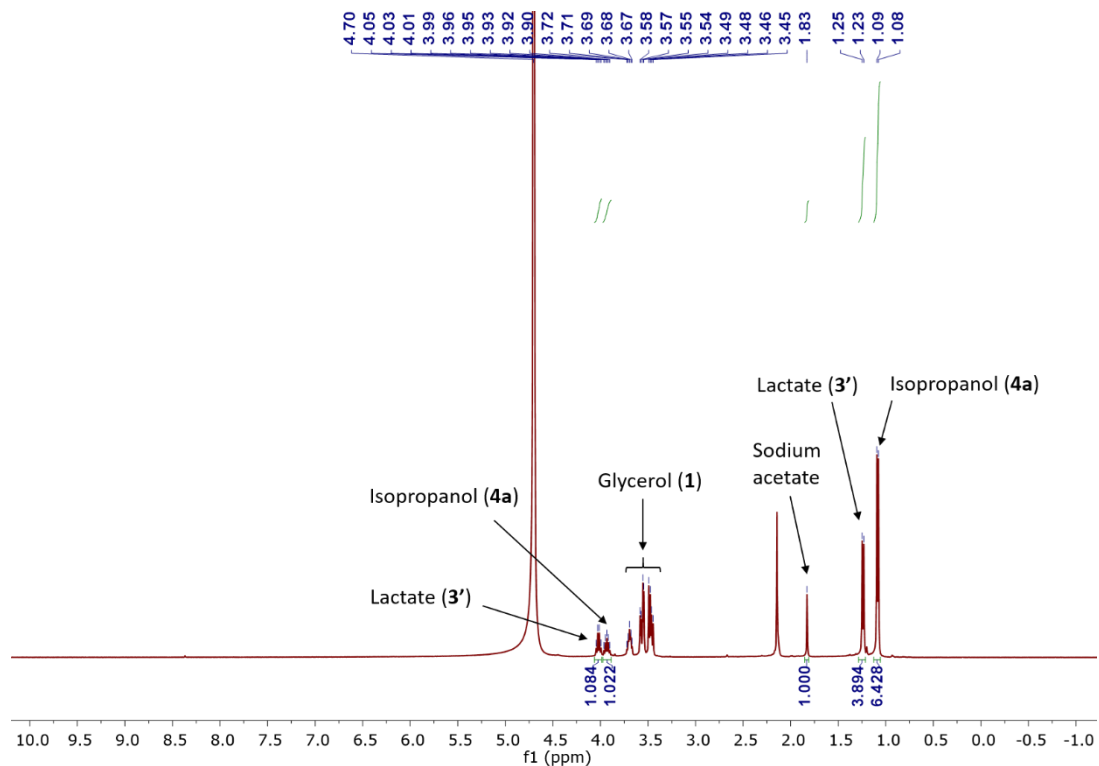

**Figure S4:** <sup>1</sup>H NMR spectra of glycerol (**1**) transfer dehydrogenation to lactate catalyzed by 0.5 mol% CrCl<sub>3</sub>·6H<sub>2</sub>O, 0.75 equivalents KOH, at 160 °C. (entry 2, Table 1).



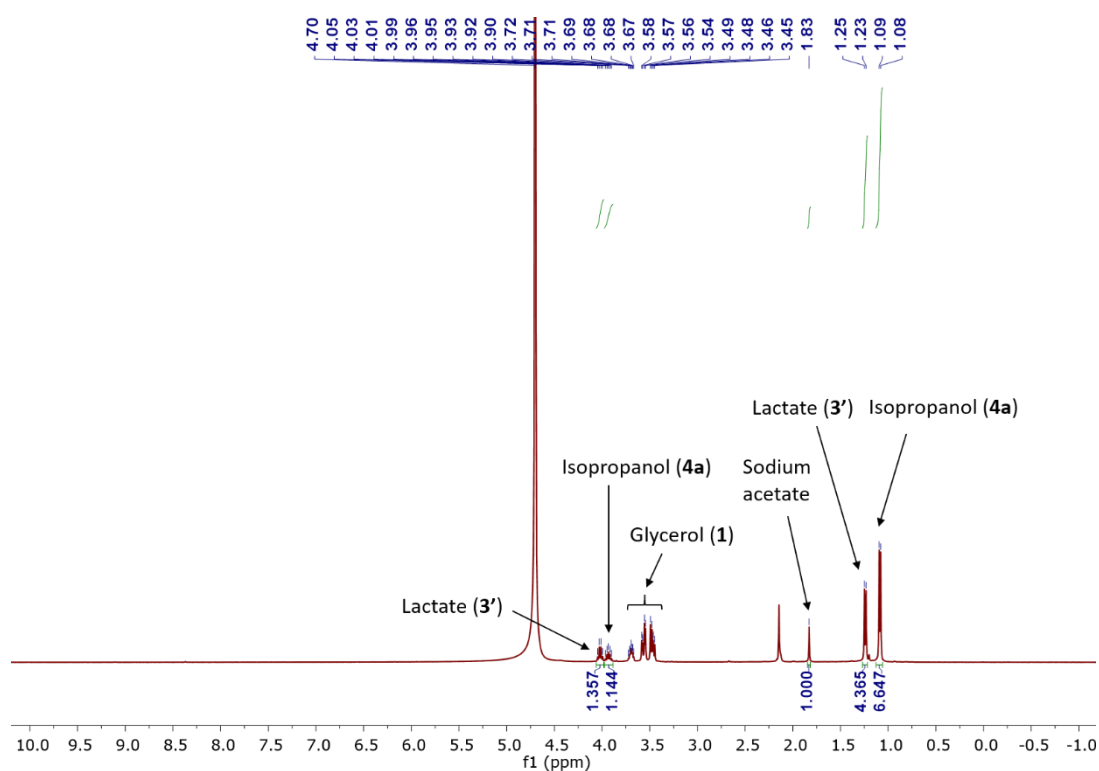

**Figure S5:** <sup>1</sup>H NMR spectra of glycerol (**1**) transfer dehydrogenation to lactate catalyzed by 0.5 mol% CrCl<sub>3</sub>·6H<sub>2</sub>O, 1 equivalent KOH, at 160 °C. (entry 3, Table 1).

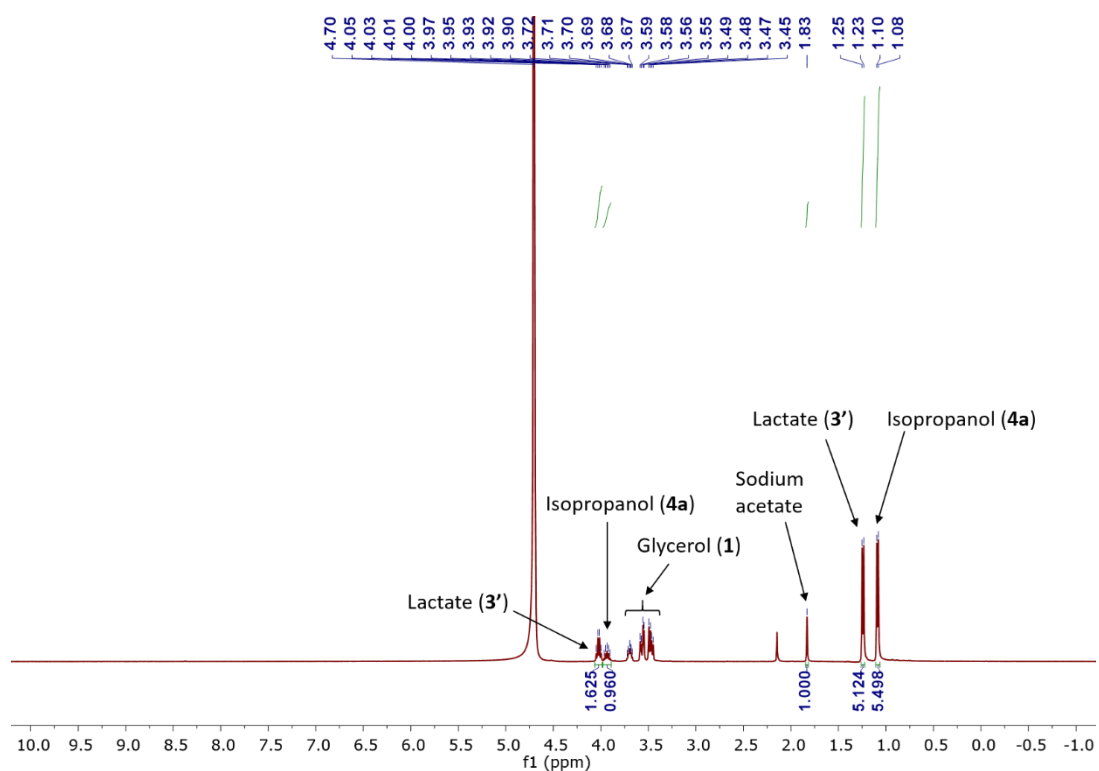

**Figure S6:** <sup>1</sup>H NMR spectra of glycerol (**1**) transfer dehydrogenation to lactate catalyzed by 0.5 mol% CrCl<sub>3</sub>·6H<sub>2</sub>O, 1.1 equivalents KOH, at 160 °C. (entry 4, Table 1).

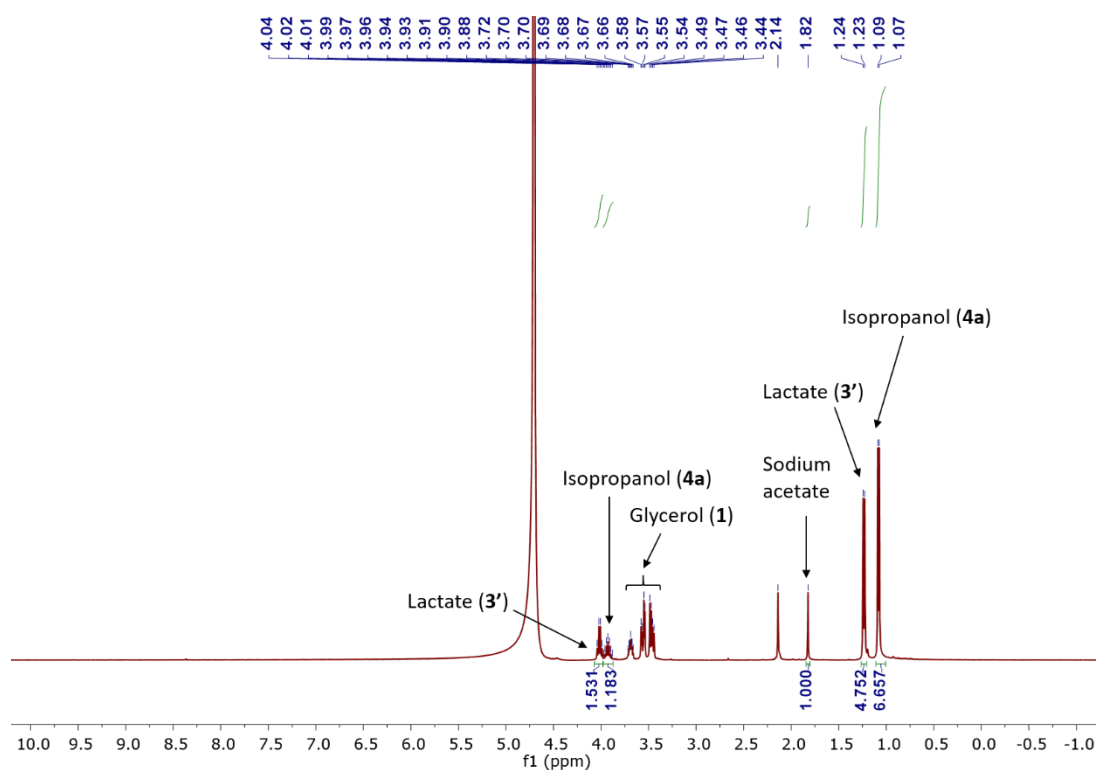

**Figure S7:** <sup>1</sup>H NMR spectra of glycerol (**1**) transfer dehydrogenation to lactate catalyzed by 0.5 mol% CrCl<sub>3</sub>·6H<sub>2</sub>O, 1.2 equivalents KOH, at 160 °C. (entry 5, Table 1).

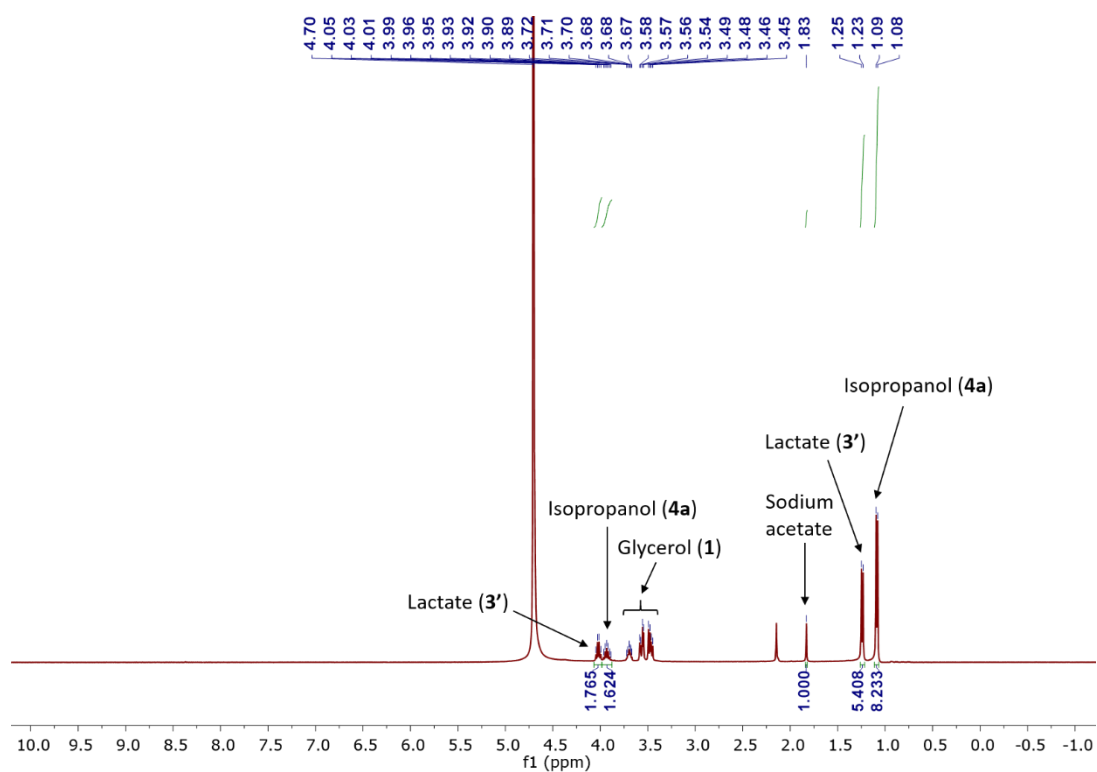

**Figure S8:** <sup>1</sup>H NMR spectra of glycerol (**1**) transfer dehydrogenation to lactate catalyzed by 0.5 mol% CrCl<sub>3</sub>·6H<sub>2</sub>O, 1.3 equivalents KOH, at 160 °C. (entry 6, Table 1).

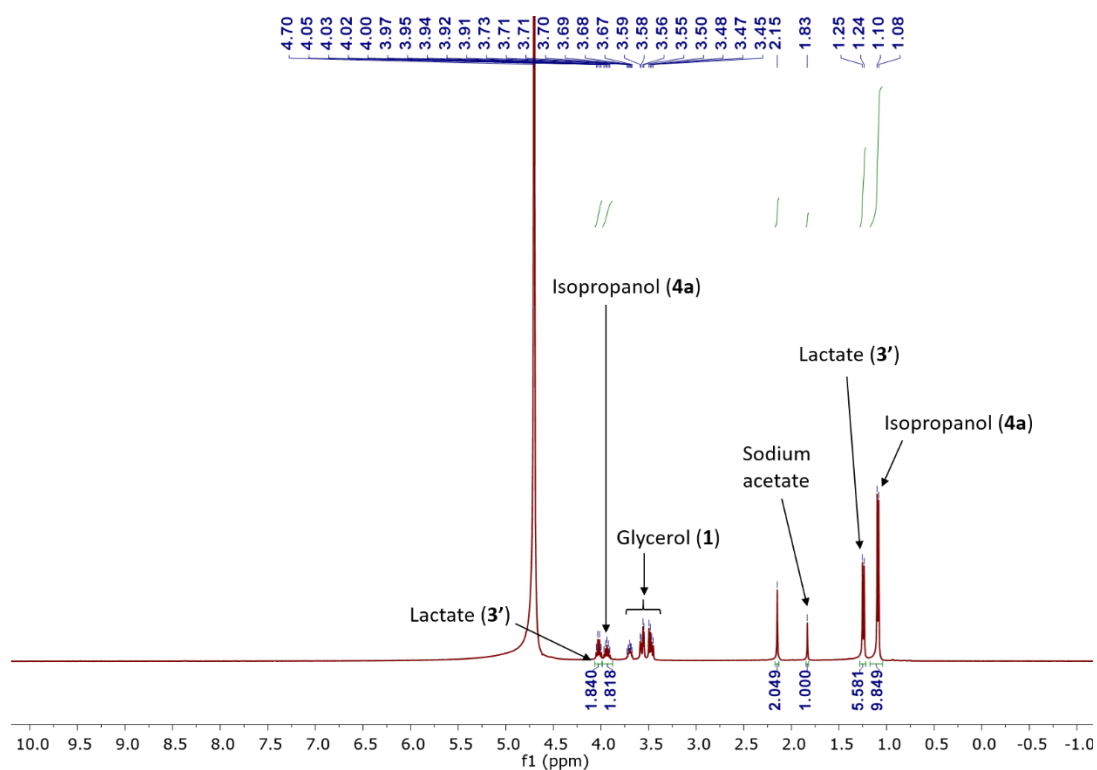

**Figure S9:** <sup>1</sup>H NMR spectra of glycerol (**1**) transfer dehydrogenation to lactate catalyzed by 0.75 mol% CrCl<sub>3</sub>·6H<sub>2</sub>O, 1.1 equivalents KOH, at 160 °C. (entry 7, Table 1).

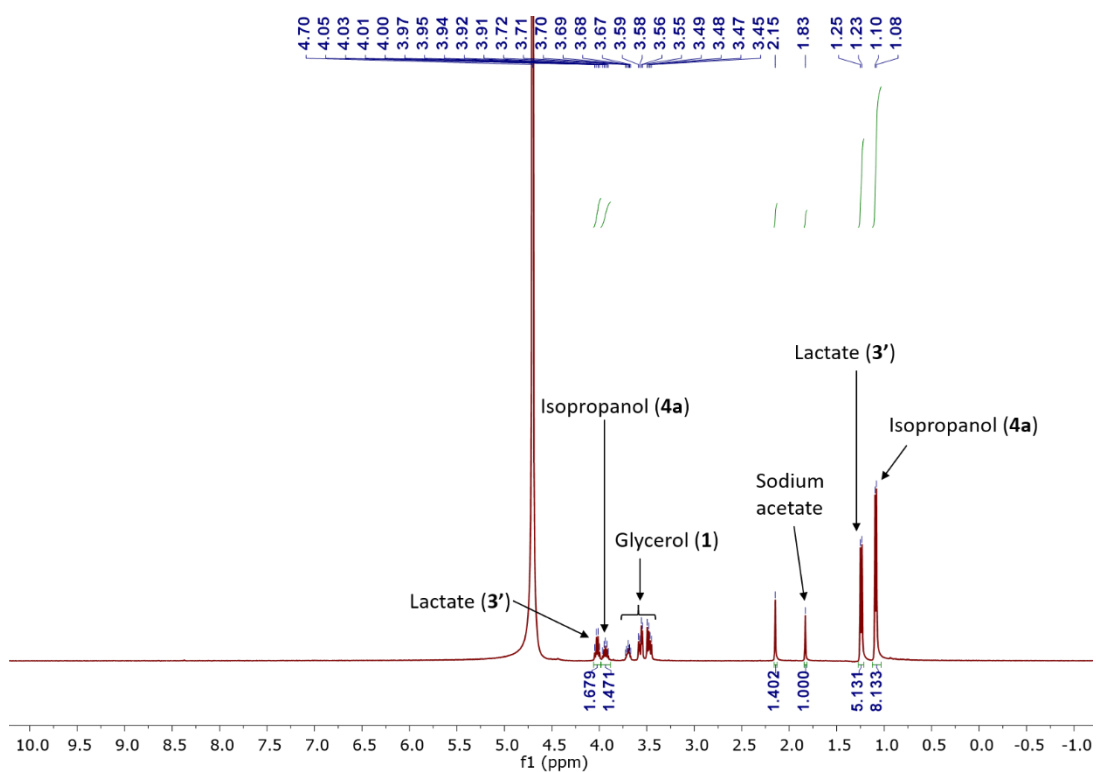

**Figure S10:** <sup>1</sup>H NMR spectra of glycerol (**1**) transfer dehydrogenation to lactate catalyzed by 0.25 mol% CrCl<sub>3</sub>·6H<sub>2</sub>O, 1.1 equivalents KOH, at 160 °C. (entry 8, Table 1).

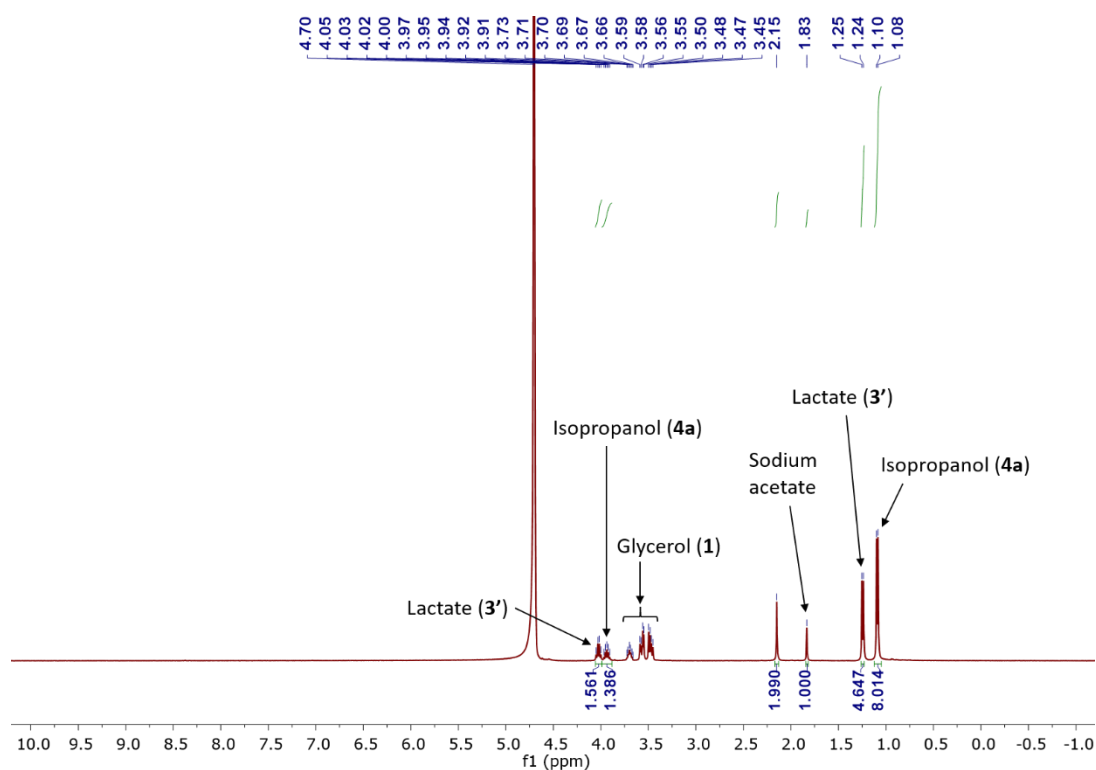

**Figure S11:** <sup>1</sup>H NMR spectra of glycerol (**1**) transfer dehydrogenation to lactate catalyzed by 0.1 mol% CrCl<sub>3</sub>·6H<sub>2</sub>O, 1.1 equivalents KOH, at 160 °C. (entry 9, Table 1).

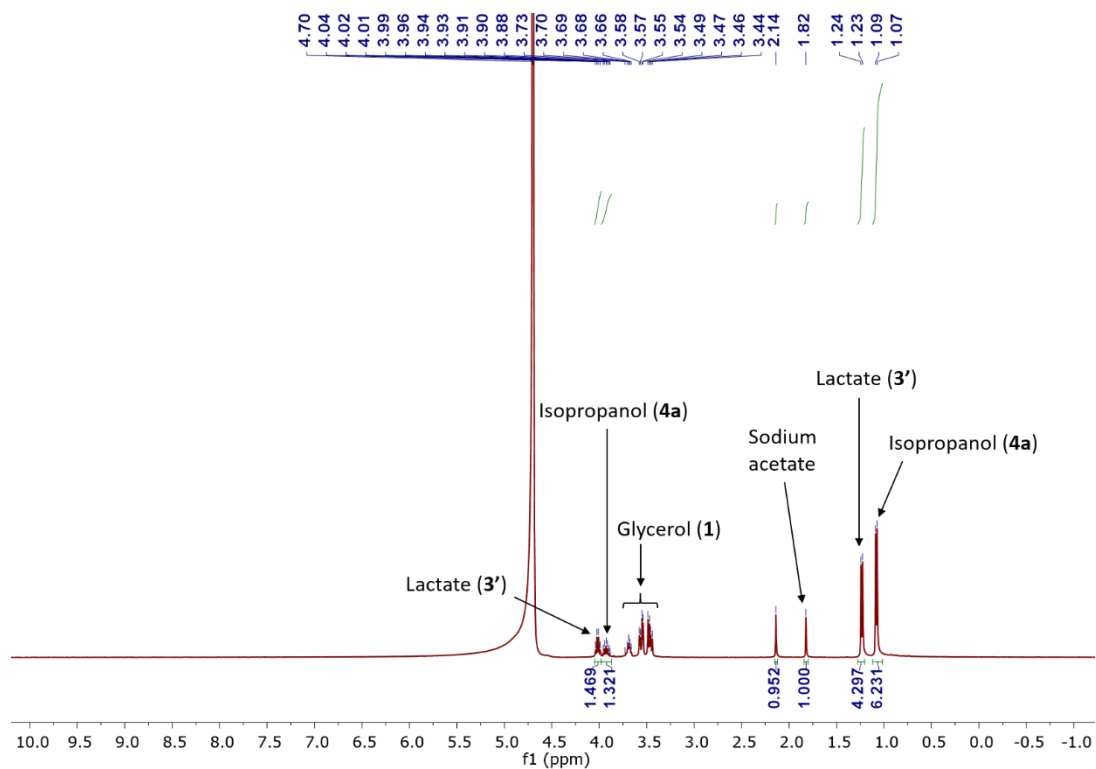

**Figure S12:** <sup>1</sup>H NMR spectra of glycerol (**1**) transfer dehydrogenation to lactate catalyzed by 0.075 mol% CrCl<sub>3</sub>·6H<sub>2</sub>O, 1.1 equivalents KOH, at 160 °C. (entry 10, Table 1).

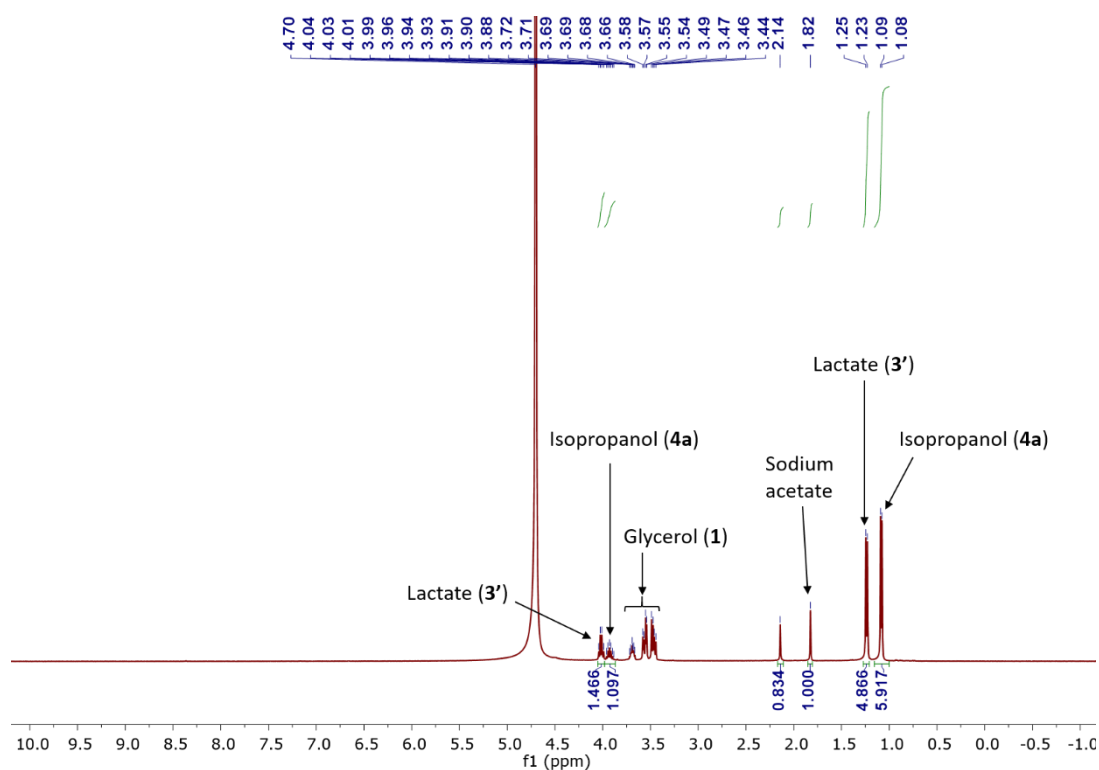

**Figure S13:**  $^1\text{H}$  NMR spectra of glycerol (**1**) transfer dehydrogenation to lactate catalyzed by 0.05 mol%  $\text{CrCl}_3 \cdot 6\text{H}_2\text{O}$ , 1.1 equivalents KOH, at 160 °C. (entry 11, Table 1).

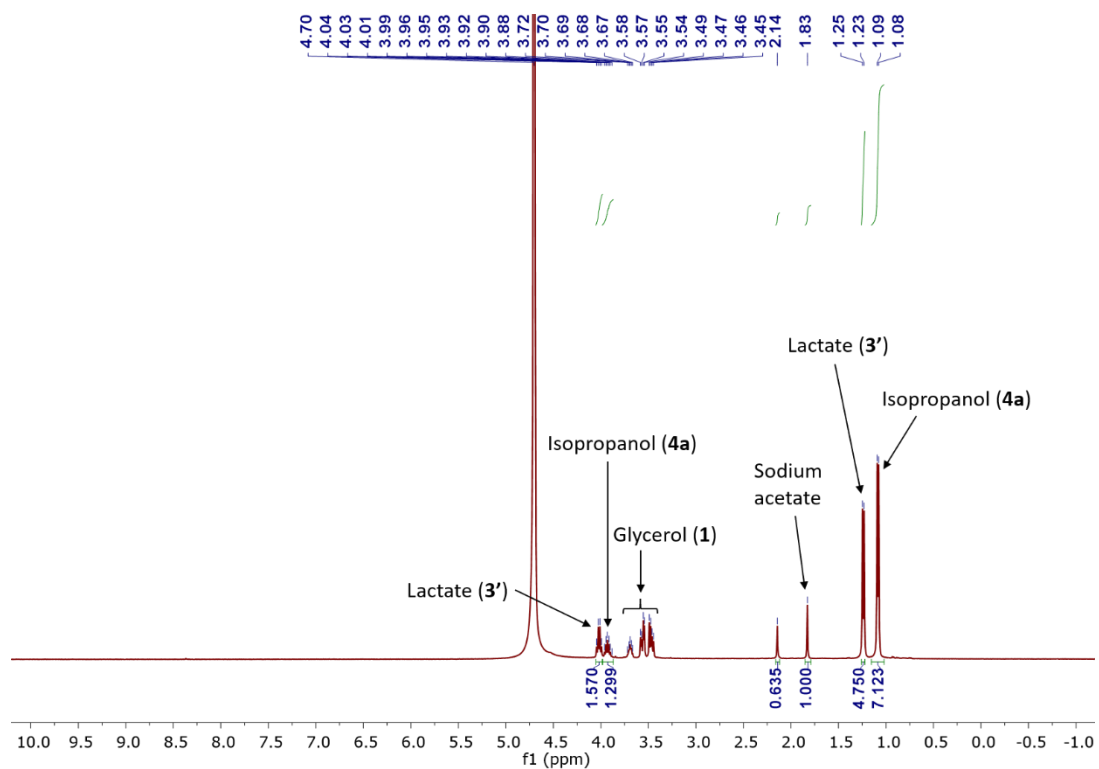

**Figure S14:**  $^1\text{H}$  NMR spectra of glycerol (**1**) transfer dehydrogenation to lactate catalyzed by 0.025 mol%  $\text{CrCl}_3 \cdot 6\text{H}_2\text{O}$ , 1.1 equivalents KOH, at 160 °C. (entry 12, Table 1).



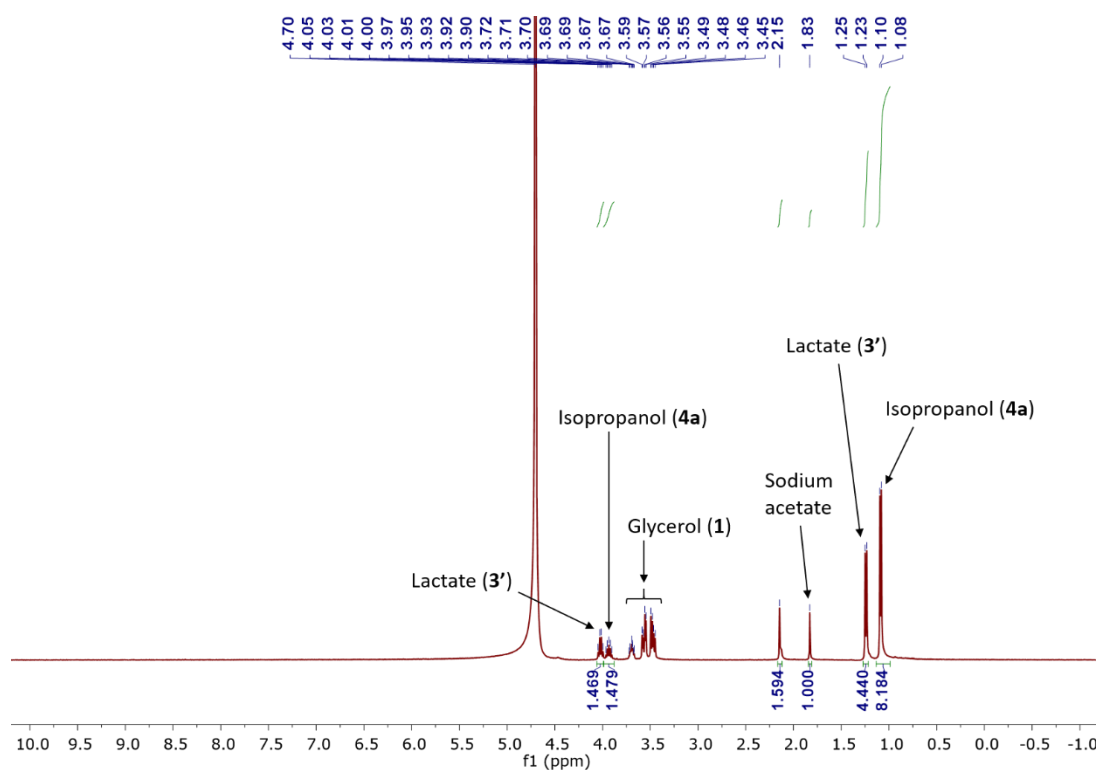

**Figure S15:** <sup>1</sup>H NMR spectra of glycerol (**1**) transfer dehydrogenation to lactate catalyzed by 0.01 mol% CrCl<sub>3</sub>·6H<sub>2</sub>O, 1.1 equivalents KOH, at 160 °C. (entry 13, Table 1).

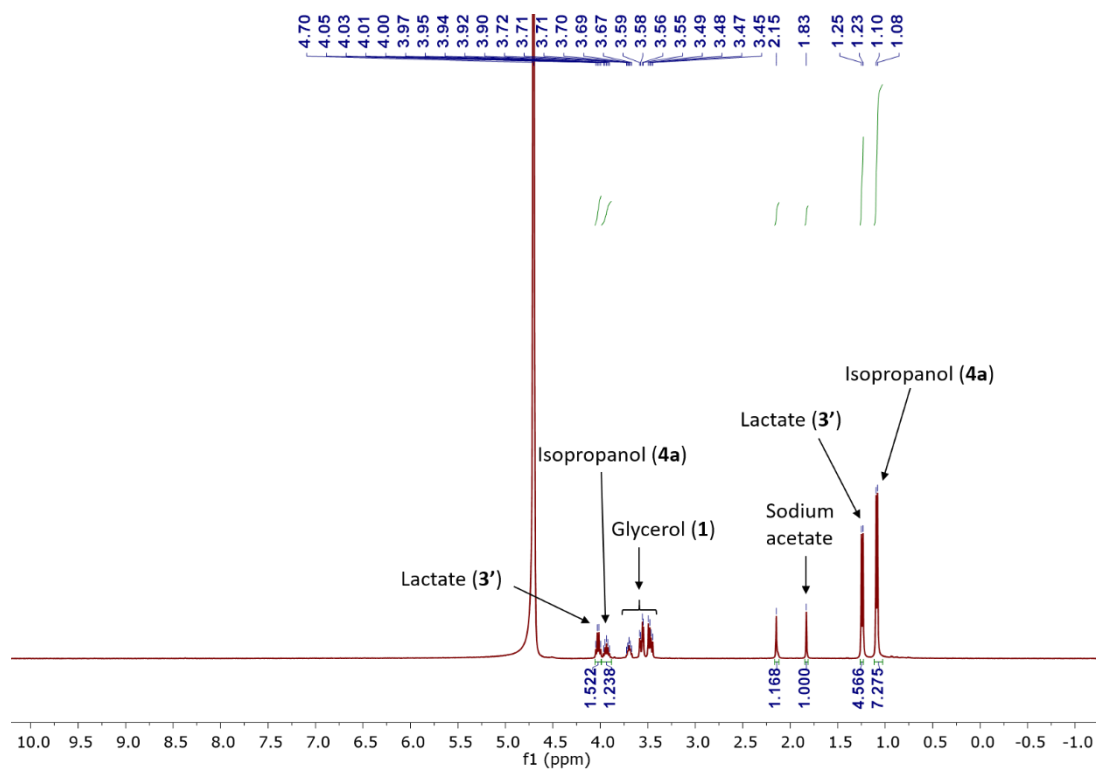

**Figure S16:** <sup>1</sup>H NMR spectra of glycerol (**1**) transfer dehydrogenation to lactate catalyzed by 0.0075 mol% CrCl<sub>3</sub>·6H<sub>2</sub>O, 1.1 equivalents KOH, at 160 °C. (entry 14, Table 1).

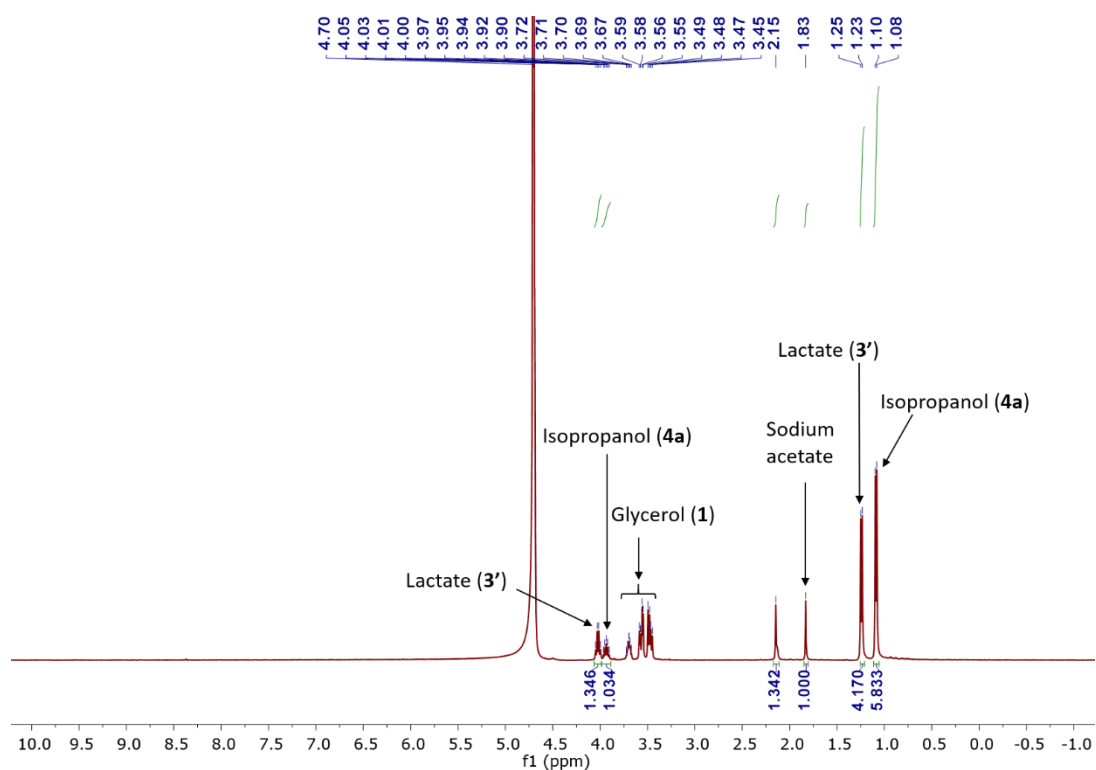

**Figure S17:**  $^1\text{H}$  NMR spectra of glycerol (1) transfer dehydrogenation to lactate catalyzed by 0.005 mol%  $\text{CrCl}_3 \cdot 6\text{H}_2\text{O}$ , 1.1 equivalents KOH, at 160 °C. (entry 15, Table 1).

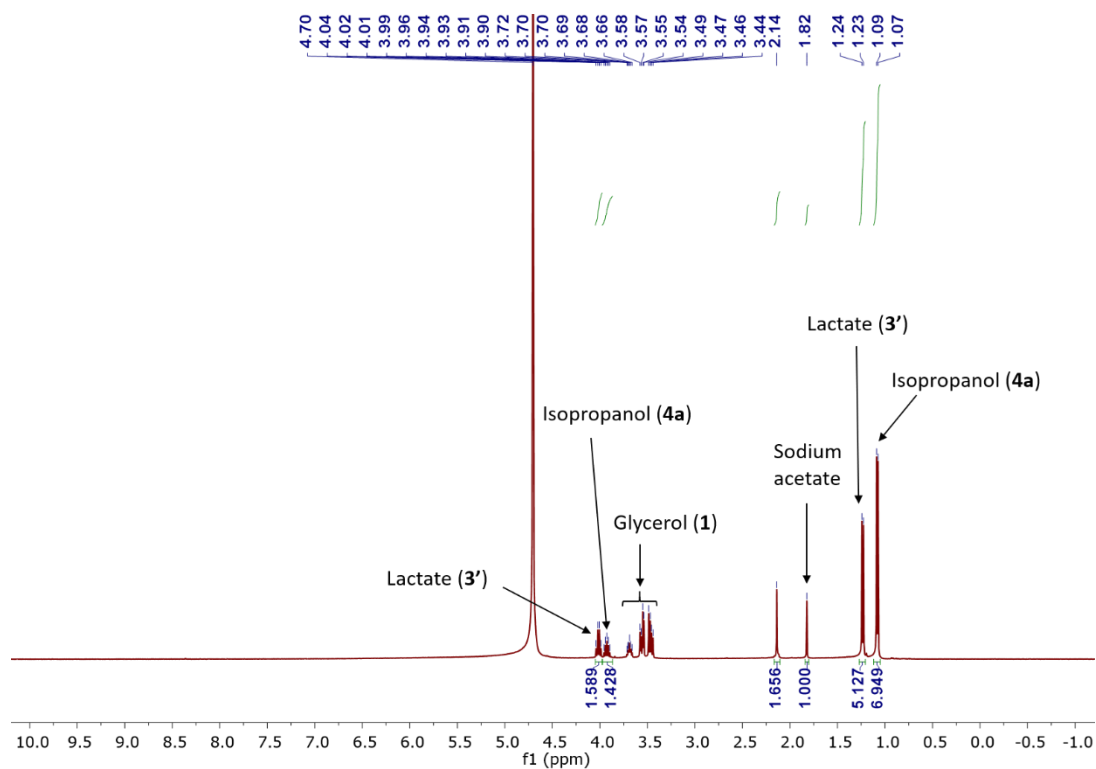

**Figure S18:**  $^1\text{H}$  NMR spectra of glycerol (1) transfer dehydrogenation to lactate catalyzed by 0.0025 mol%  $\text{CrCl}_3 \cdot 6\text{H}_2\text{O}$ , 1.1 equivalents KOH, 1.5 equivalents acetone, at 160 °C. (entry 17, Table 1).

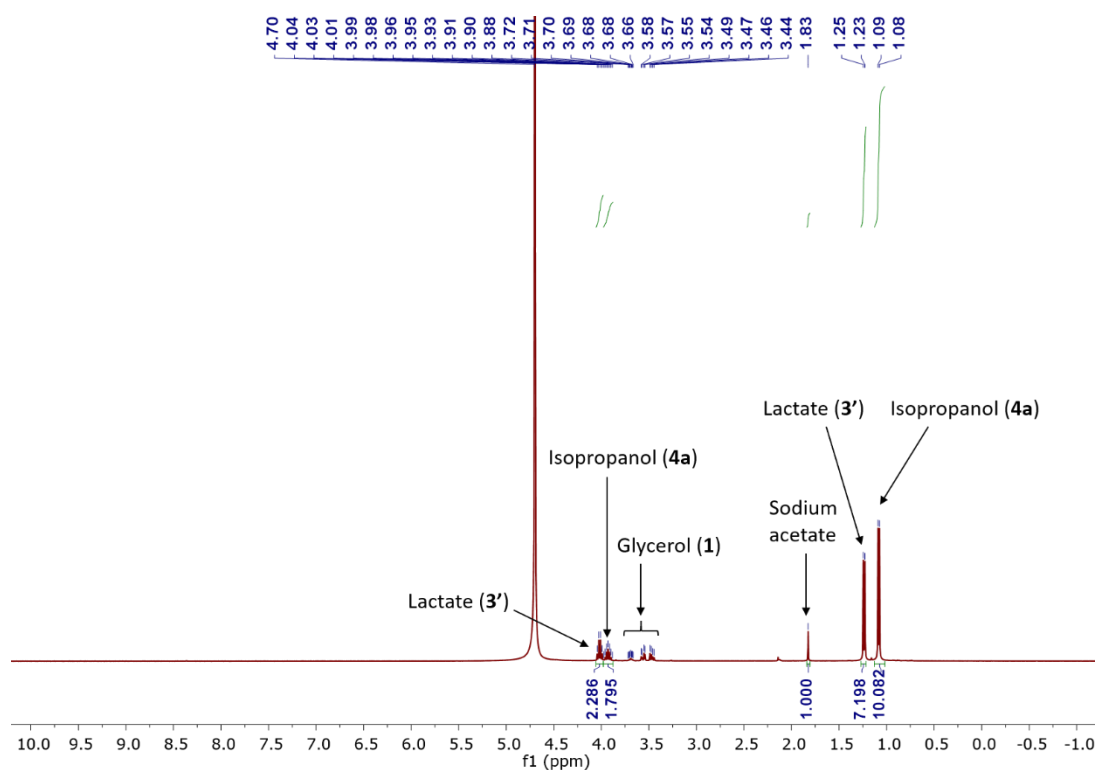

**Figure S19:** <sup>1</sup>H NMR spectra of glycerol (**1**) transfer dehydrogenation to lactate catalyzed by 0.5 mol% CrCl<sub>3</sub>·6H<sub>2</sub>O, 1.1 equivalents NaOH, at 160 °C. (entry 18, Table 1).

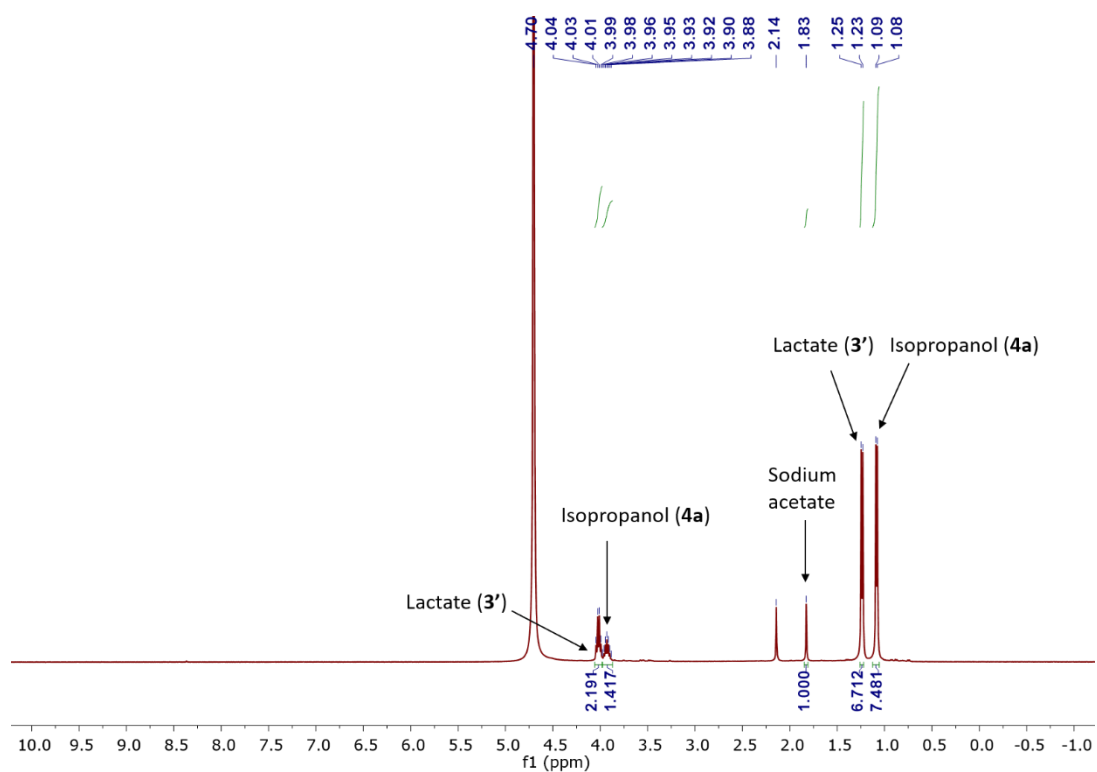

**Figure S20:** <sup>1</sup>H NMR spectra of glycerol (**1**) transfer dehydrogenation to lactate catalyzed by 0.5 mol% CrCl<sub>3</sub>·6H<sub>2</sub>O, 1.1 equivalents NaOH, 1.5 equivalents acetone (**2a**), at 160 °C. (entry 19, Table 1).

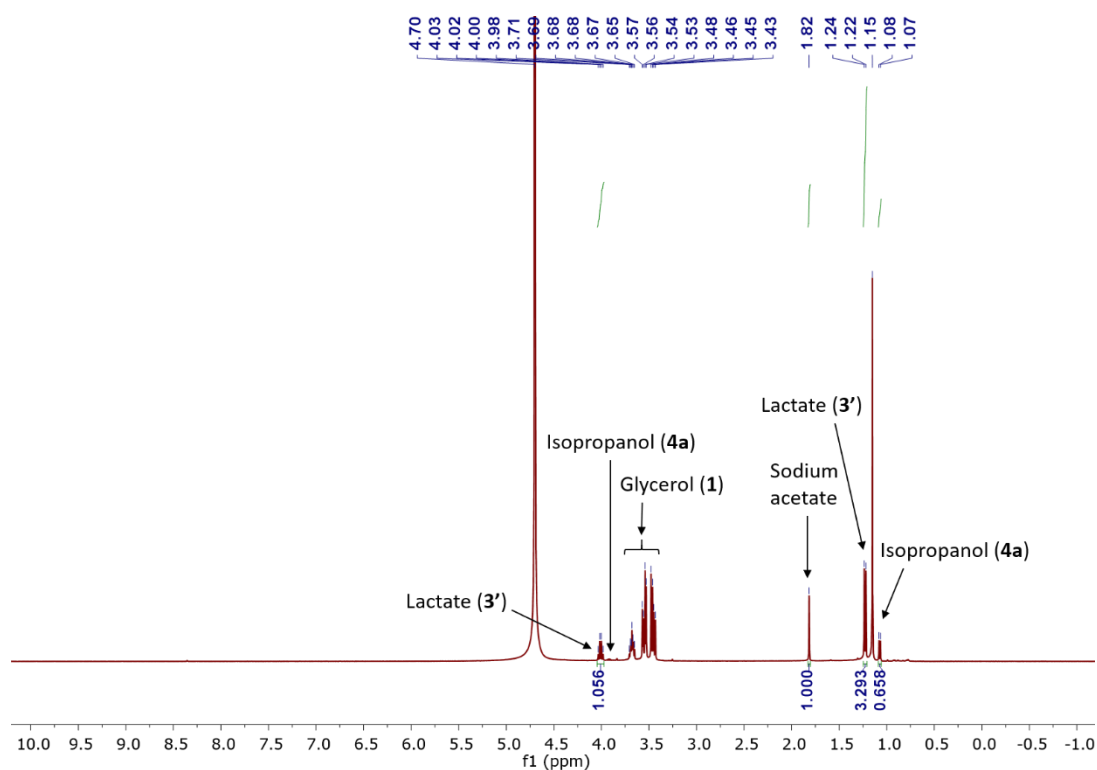

**Figure S21:** <sup>1</sup>H NMR spectra of glycerol (**1**) transfer dehydrogenation to lactate catalyzed by 0.5 mol% CrCl<sub>3</sub>·6H<sub>2</sub>O, 1.1 equivalents NaO<sup>t</sup>Bu, at 160 °C. (entry 20, Table 1).

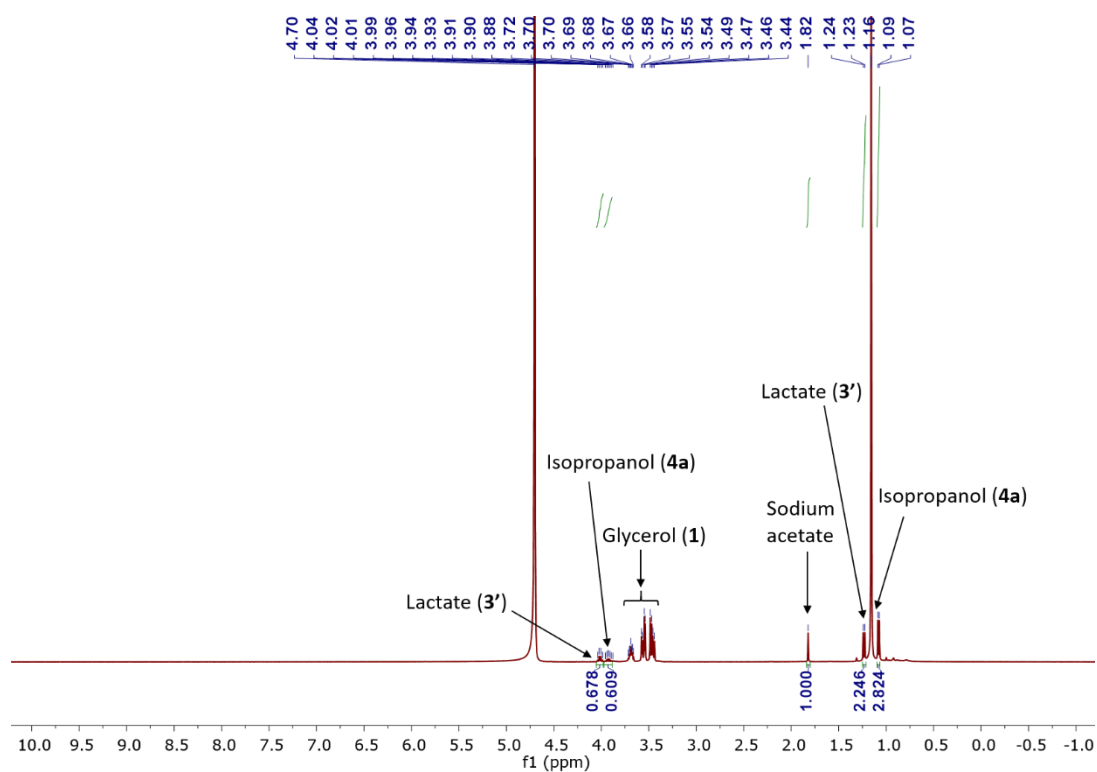

**Figure S22:** <sup>1</sup>H NMR spectra of glycerol (**1**) transfer dehydrogenation to lactate catalyzed by 0.5 mol% CrCl<sub>3</sub>·6H<sub>2</sub>O, 1.1 equivalents KO<sup>t</sup>Bu, at 160 °C. (entry 21, Table 1).

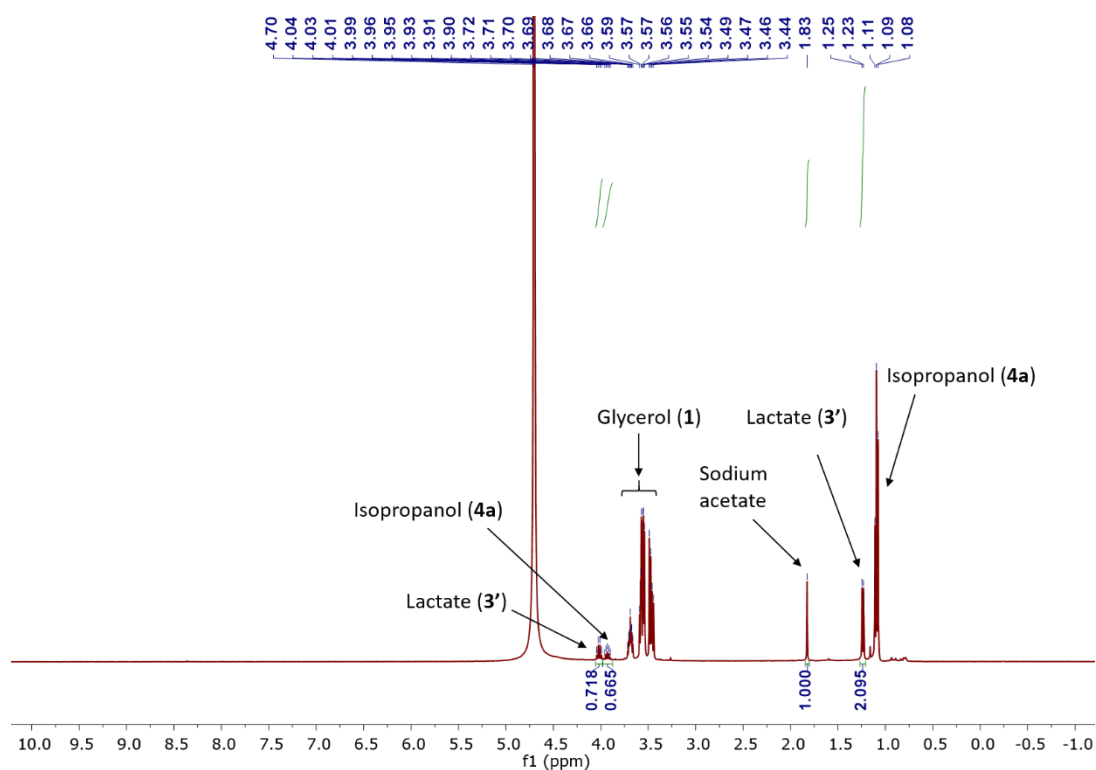

**Figure S23:** <sup>1</sup>H NMR spectra of glycerol (**1**) transfer dehydrogenation to lactate catalyzed by 0.5 mol% CrCl<sub>3</sub>·6H<sub>2</sub>O, 1.1 equivalents NaOEt, at 160 °C. (entry 22, Table 1).

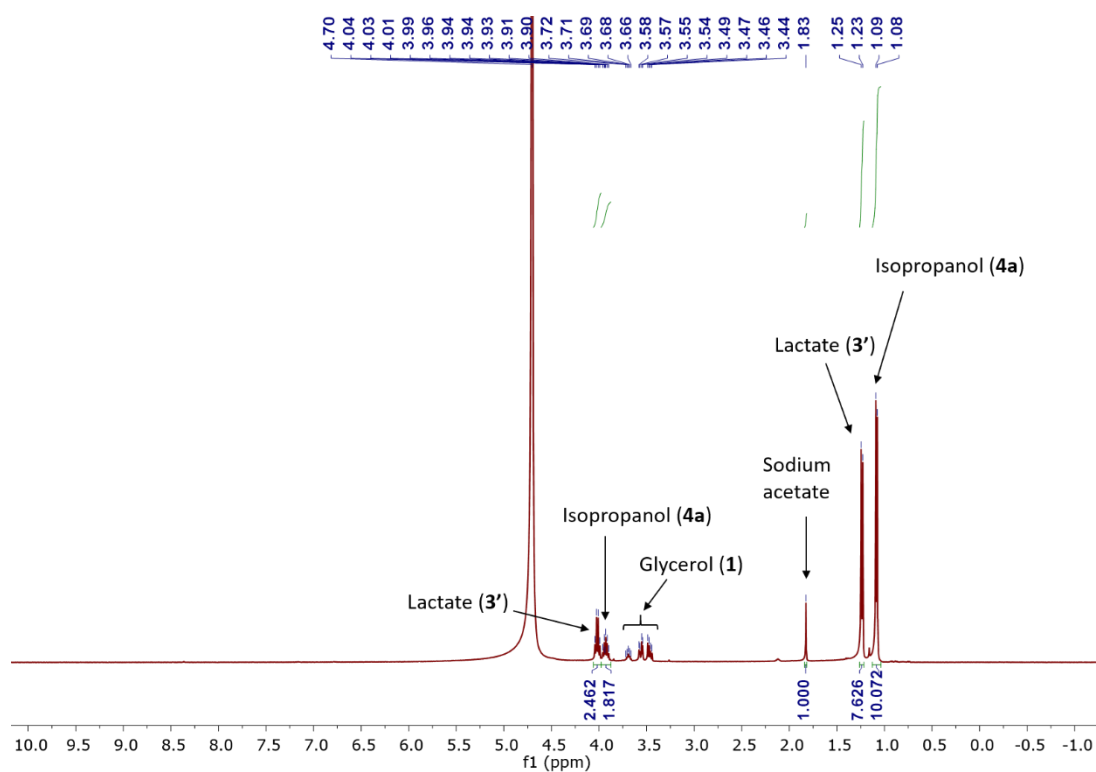

**Figure S24:** <sup>1</sup>H NMR spectra of glycerol (**1**) transfer dehydrogenation to lactate catalyzed by 0.5 mol% **5a**, 1.1 equivalents NaOH, at 160 °C. (entry 27, Table 1).



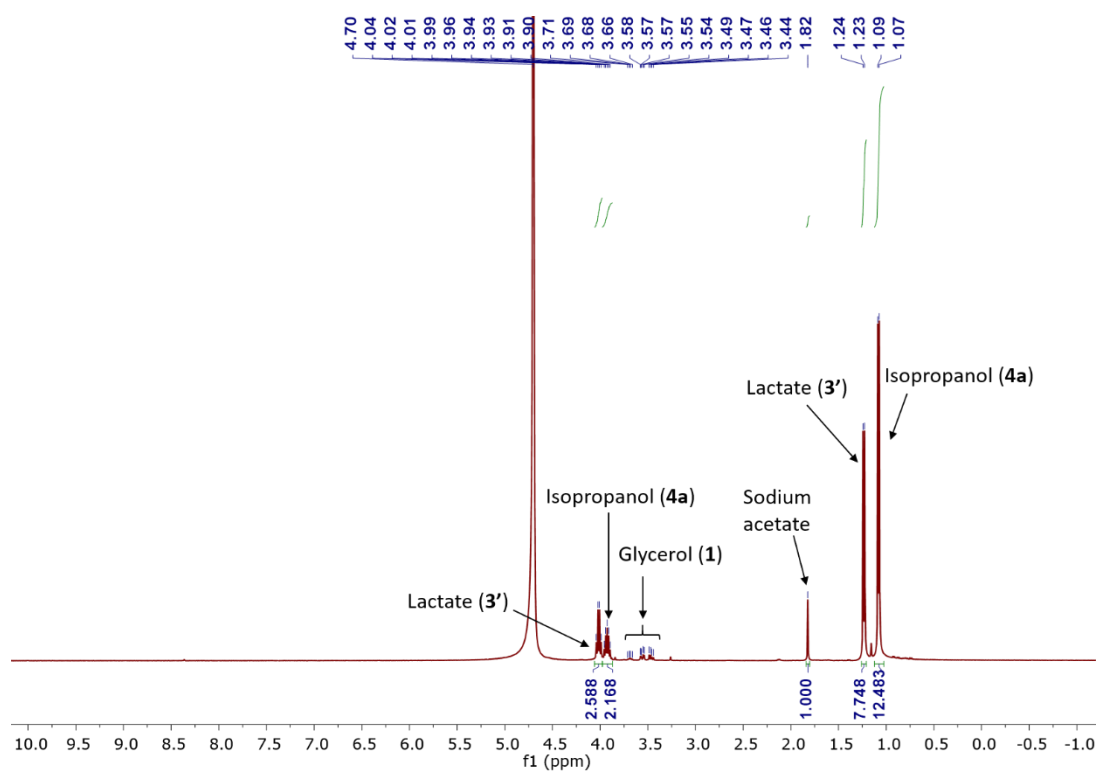

**Figure S25:** <sup>1</sup>H NMR spectra of glycerol (**1**) transfer dehydrogenation to lactate catalyzed by 0.5 mol% **5b**, 1.1 equivalents NaOH, at 160 °C. (entry 28, Table 1).

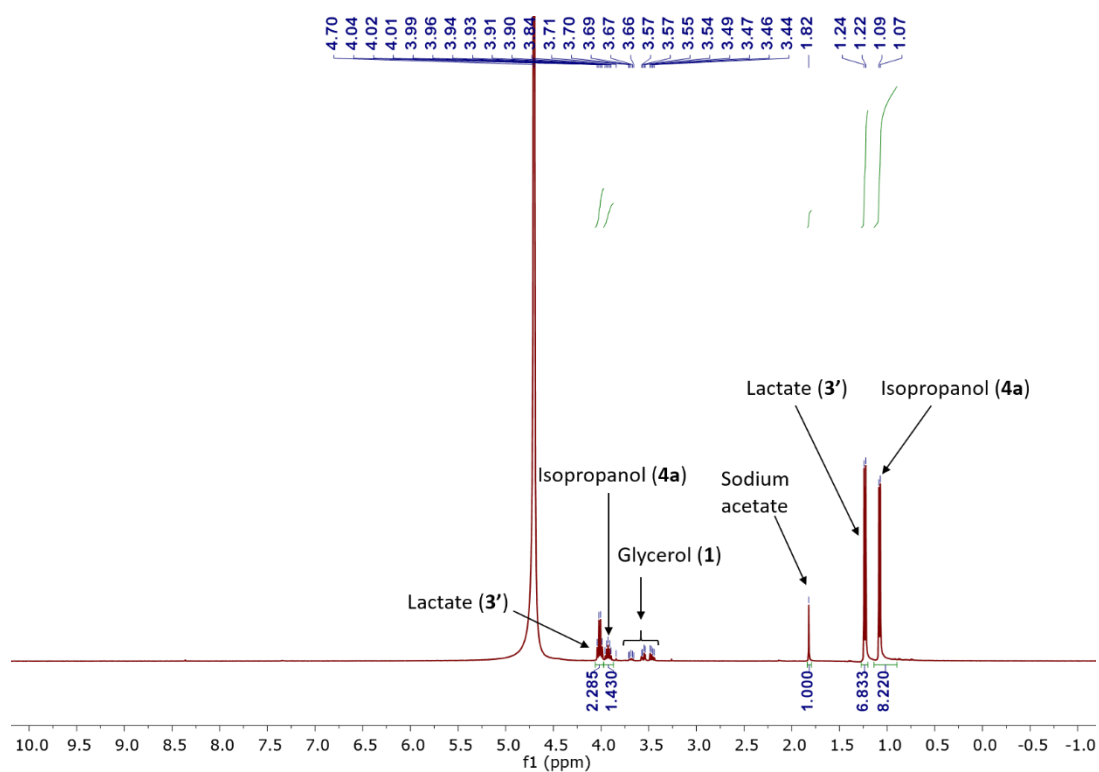

**Figure S26:** <sup>1</sup>H NMR spectra of glycerol (**1**) transfer dehydrogenation to lactate catalyzed by 0.5 mol% **5c**, 1.1 equivalents NaOH, at 160 °C. (entry 29, Table 1).

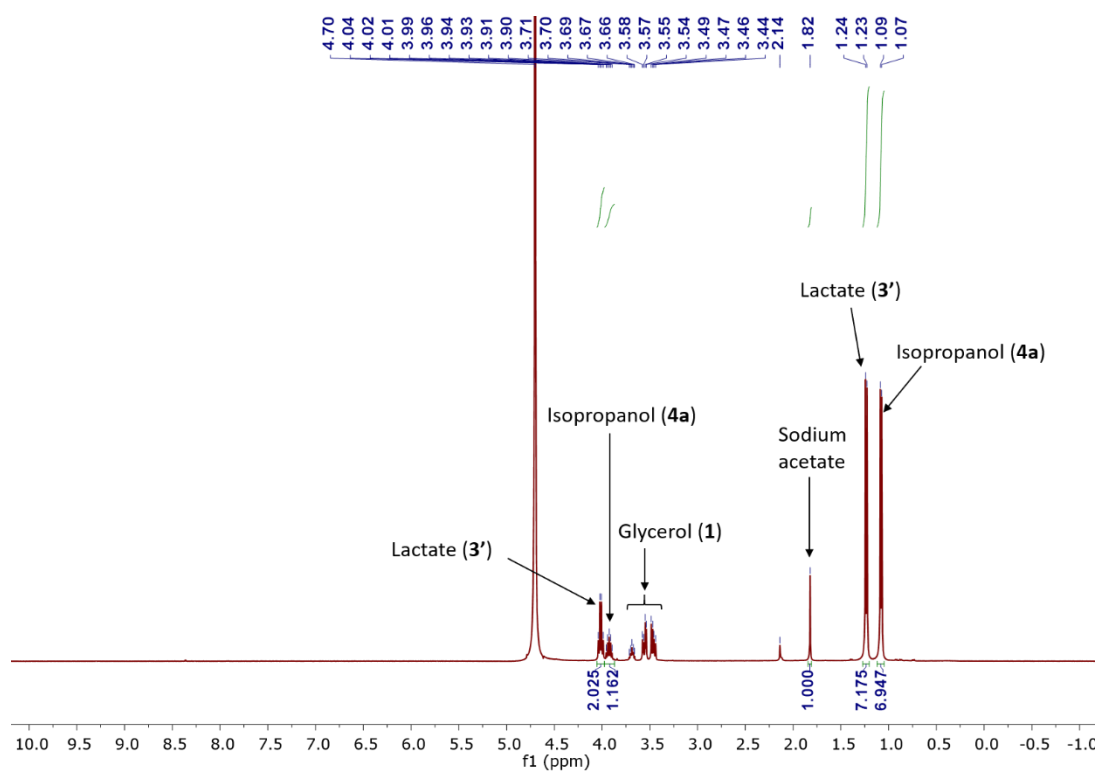

**Figure S27:** <sup>1</sup>H NMR spectra of glycerol (**1**) transfer dehydrogenation to lactate catalyzed by 0.5 mol% **5d**, 1.1 equivalents NaOH, at 160 °C. (entry 30, Table 1).

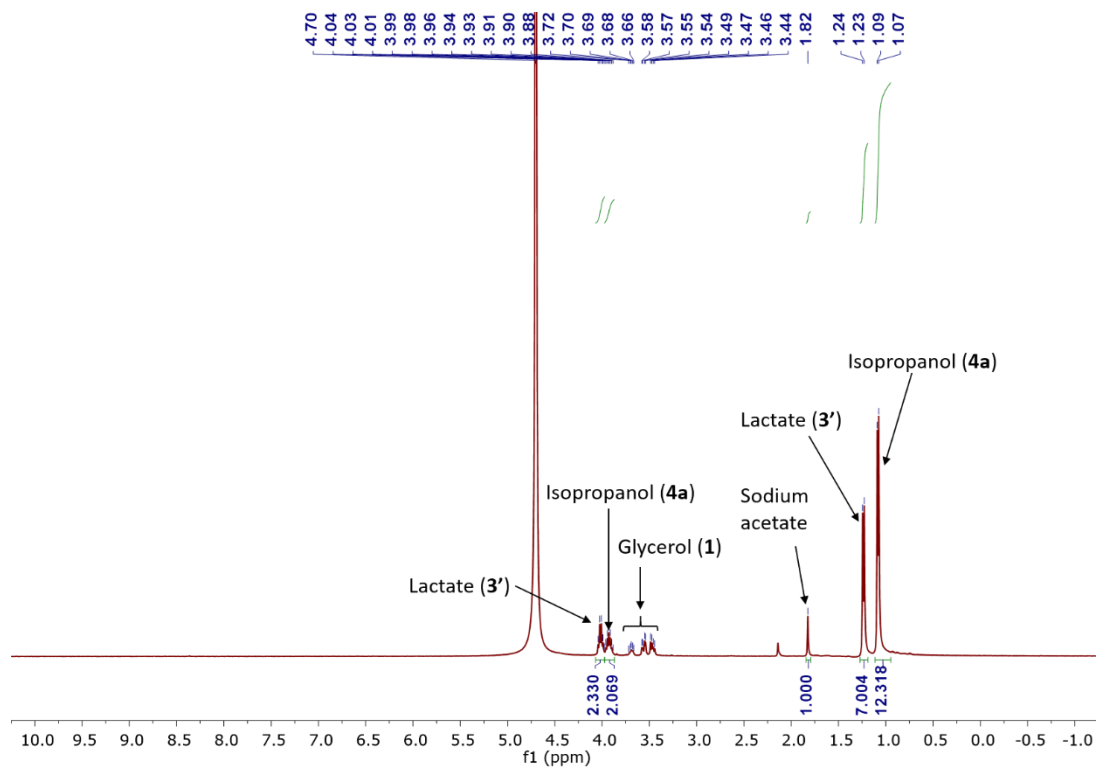

**Figure S28:** <sup>1</sup>H NMR spectra of glycerol (**1**) transfer dehydrogenation to lactate catalyzed by 0.75 mol% **5b**, 1.1 equivalents NaOH, at 160 °C. (entry 31, Table 1).

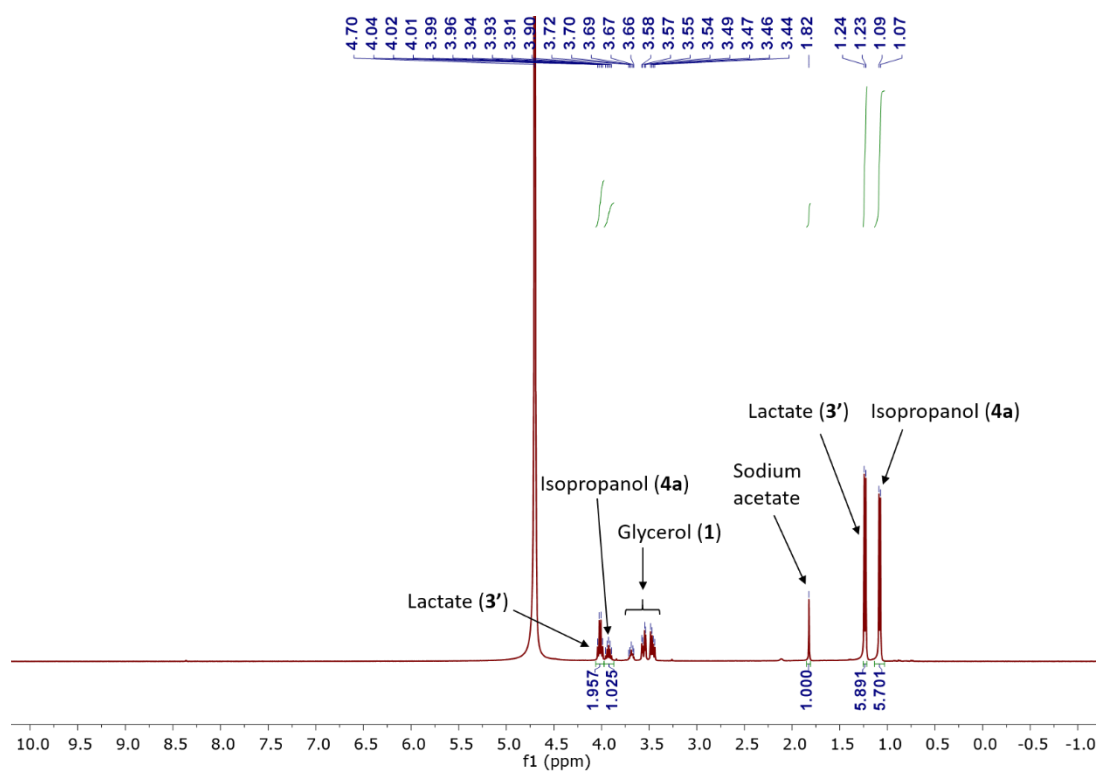

**Figure S29:**  $^1\text{H}$  NMR spectra of glycerol (**1**) transfer dehydrogenation to lactate catalyzed by 0.25 mol% **5b**, 1.1 equivalents NaOH, at 160 °C. (entry 32, Table 1).

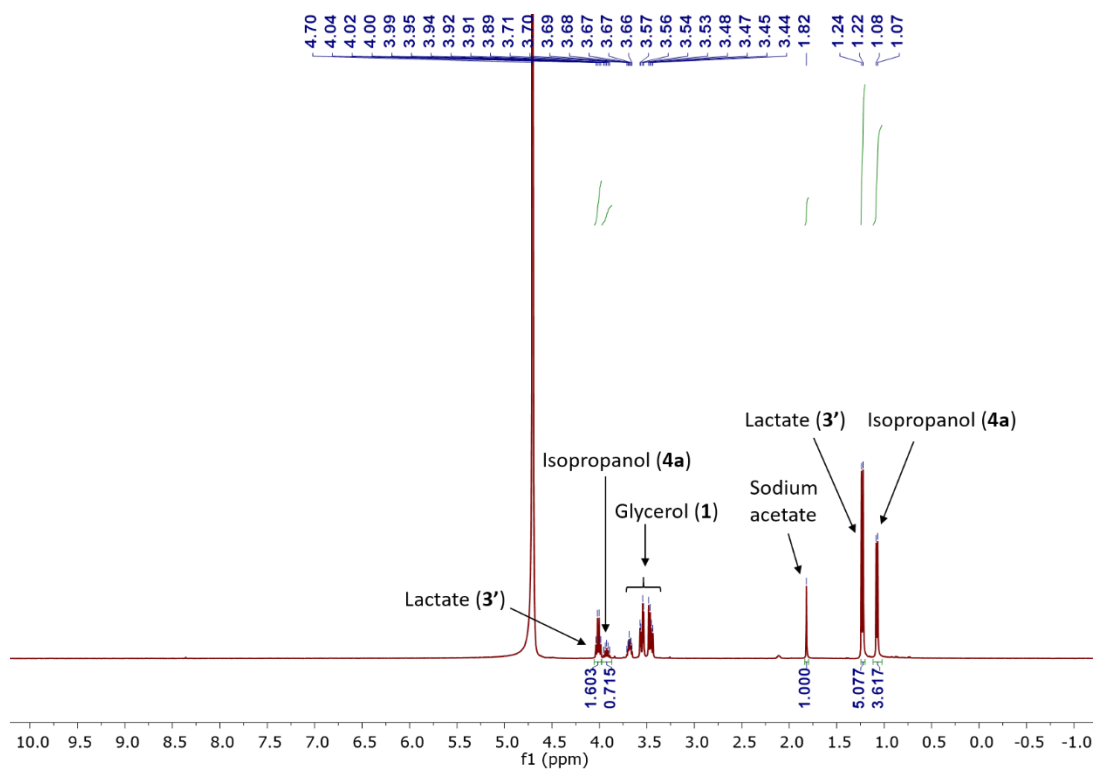

**Figure S30:**  $^1\text{H}$  NMR spectra of glycerol (**1**) transfer dehydrogenation to lactate catalyzed by 0.05 mol% **5b**, 1.1 equivalents NaOH, at 160 °C. (entry 33, Table 1).

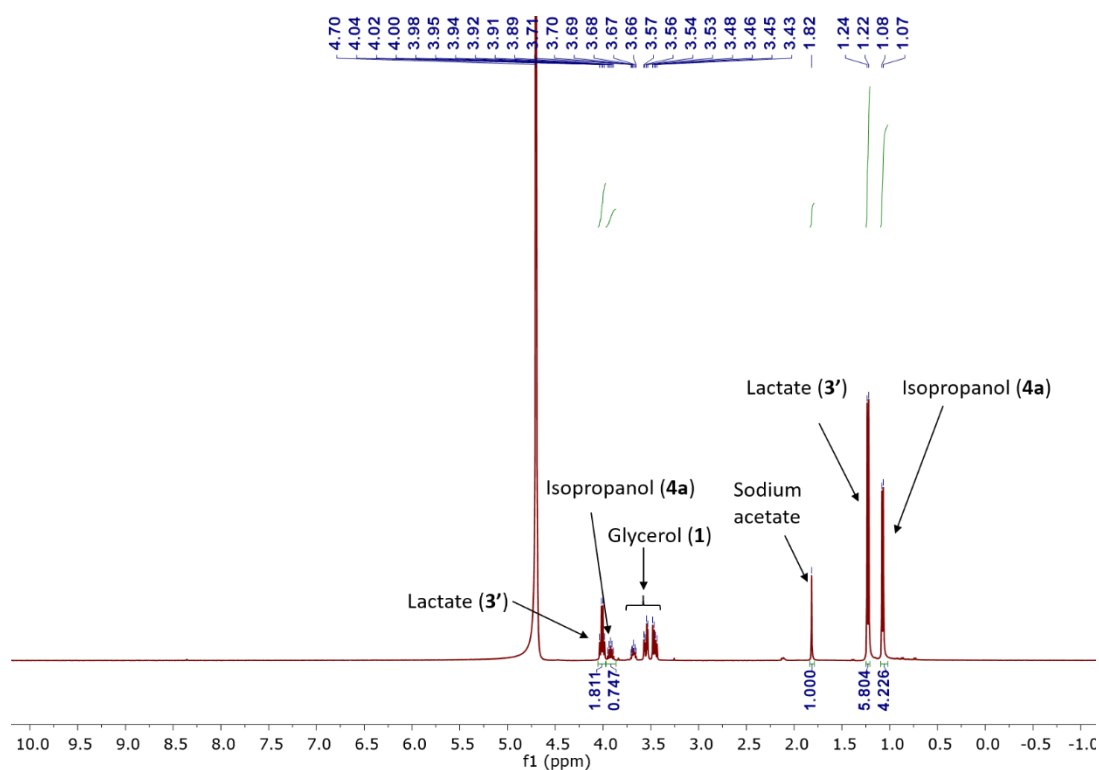

**Figure S31:** <sup>1</sup>H NMR spectra of glycerol (**1**) transfer dehydrogenation to lactate catalyzed by 0.005 mol% **5b**, 1.1 equivalents NaOH, at 160 °C. (entry 34, Table 1).

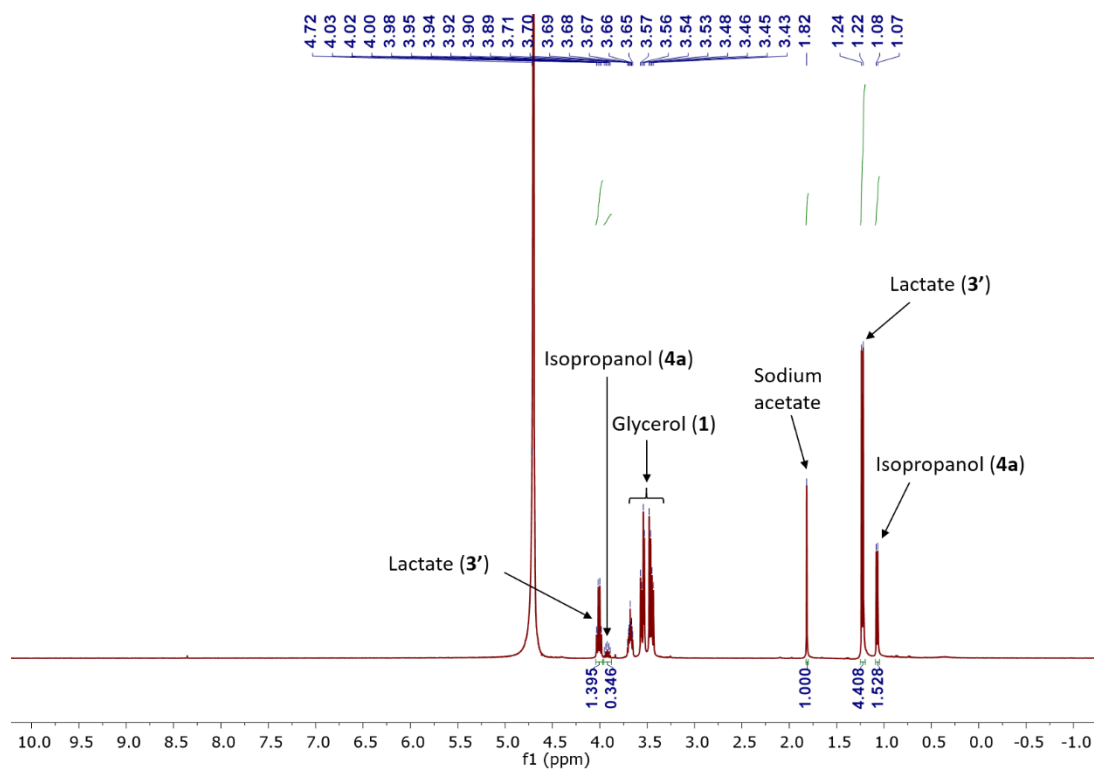

**Figure S32:** <sup>1</sup>H NMR spectra of glycerol (**1**) transfer dehydrogenation to lactate catalyzed by 0.00125 mol% **5b**, 1.1 equivalents NaOH, at 160 °C. (entry 35, Table 1).

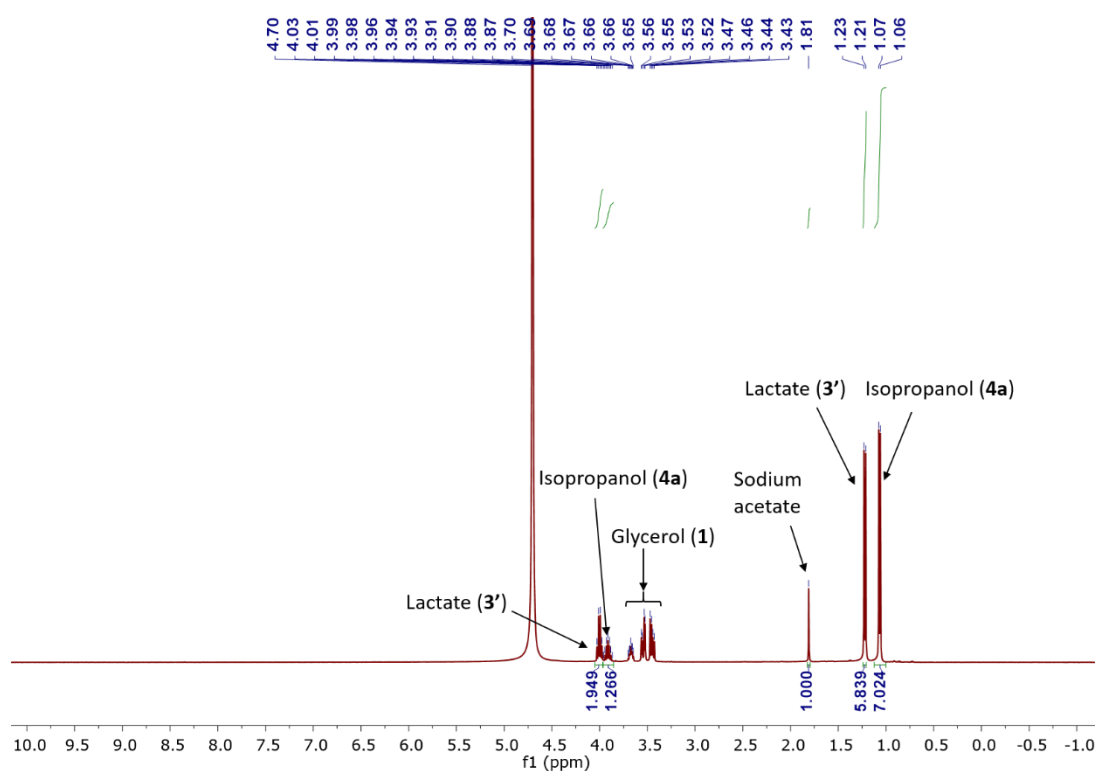

**Figure S33:**  $^1\text{H}$  NMR spectra of glycerol (**1**) transfer dehydrogenation to lactate catalyzed by 0.5 mol% **5b**, 1.1 equivalents NaOH, at 140 °C. (entry 36, Table 1).

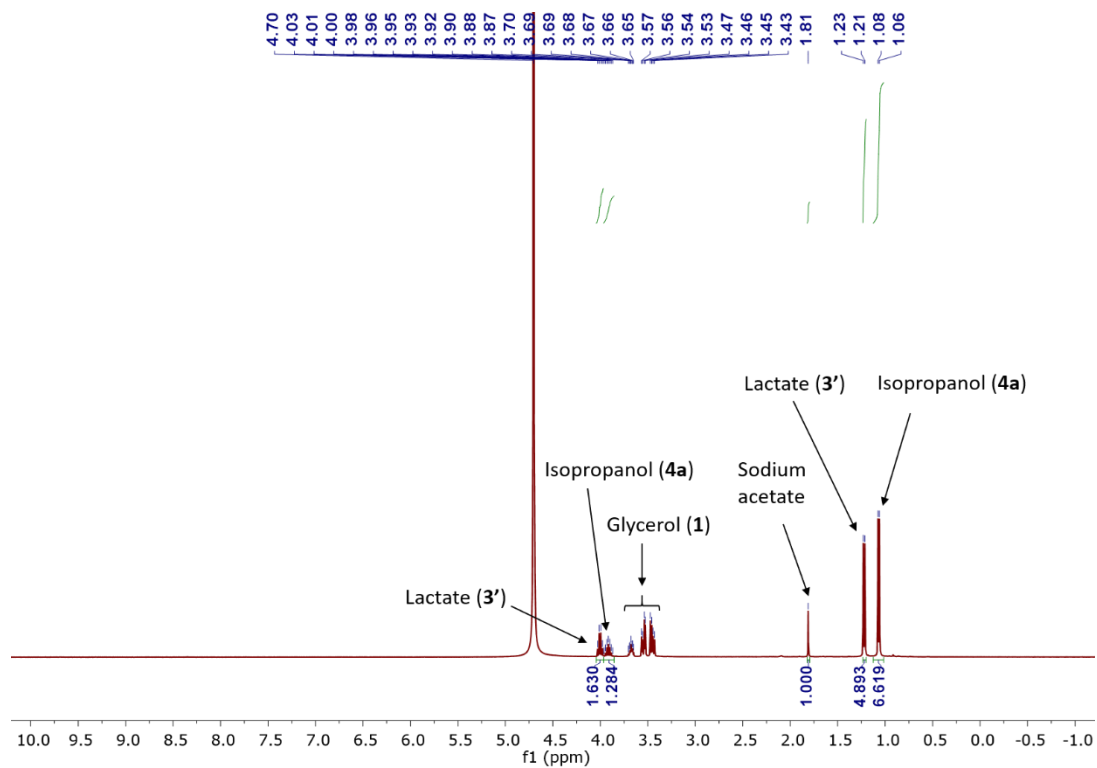

**Figure S34:**  $^1\text{H}$  NMR spectra of glycerol (**1**) transfer dehydrogenation to lactate catalyzed by 0.5 mol% **5b**, 1.1 equivalents NaOH, at 120 °C. (entry 37, Table 1).



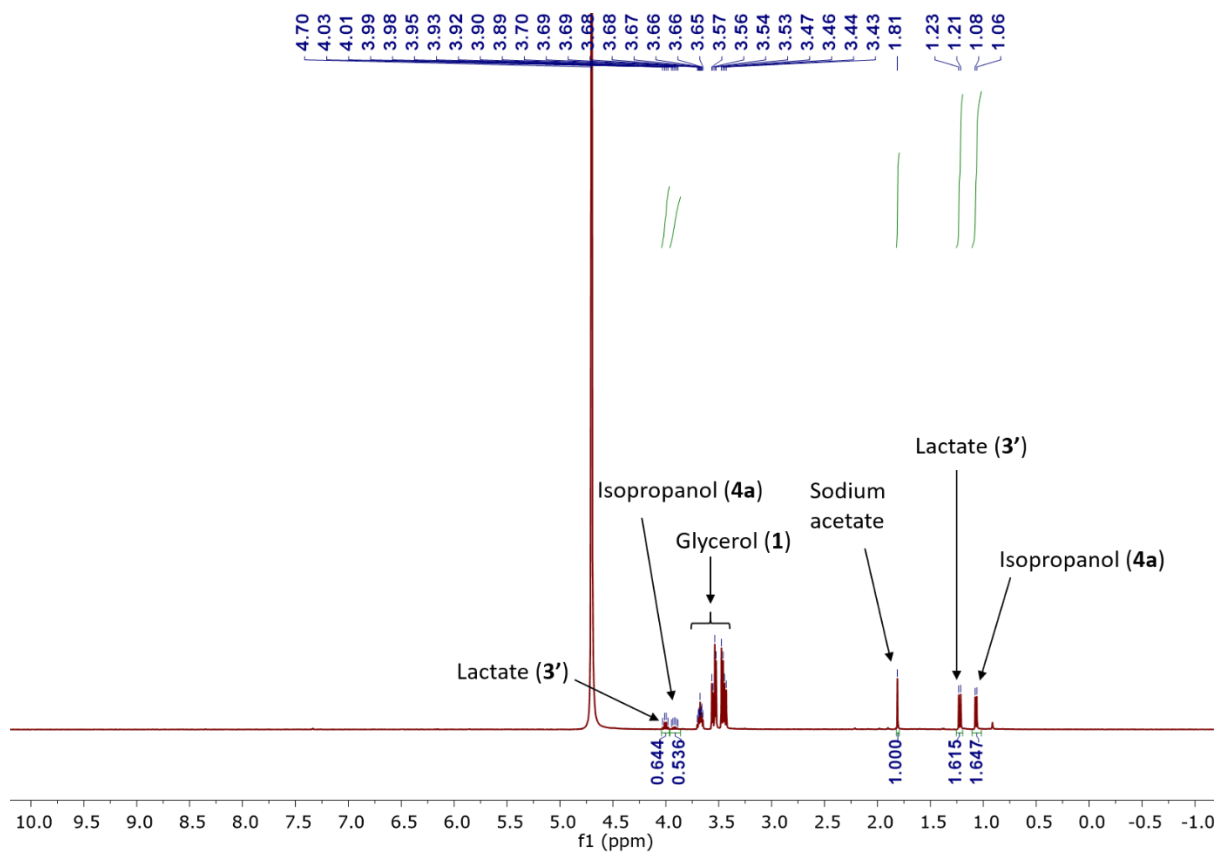

**Figure S35:**  $^1\text{H}$  NMR spectra of glycerol (**1**) transfer dehydrogenation to lactate catalyzed by 0.5 mol% **5b**, 1.1 equivalents NaOH, at 100 °C. (entry 38, Table 1).

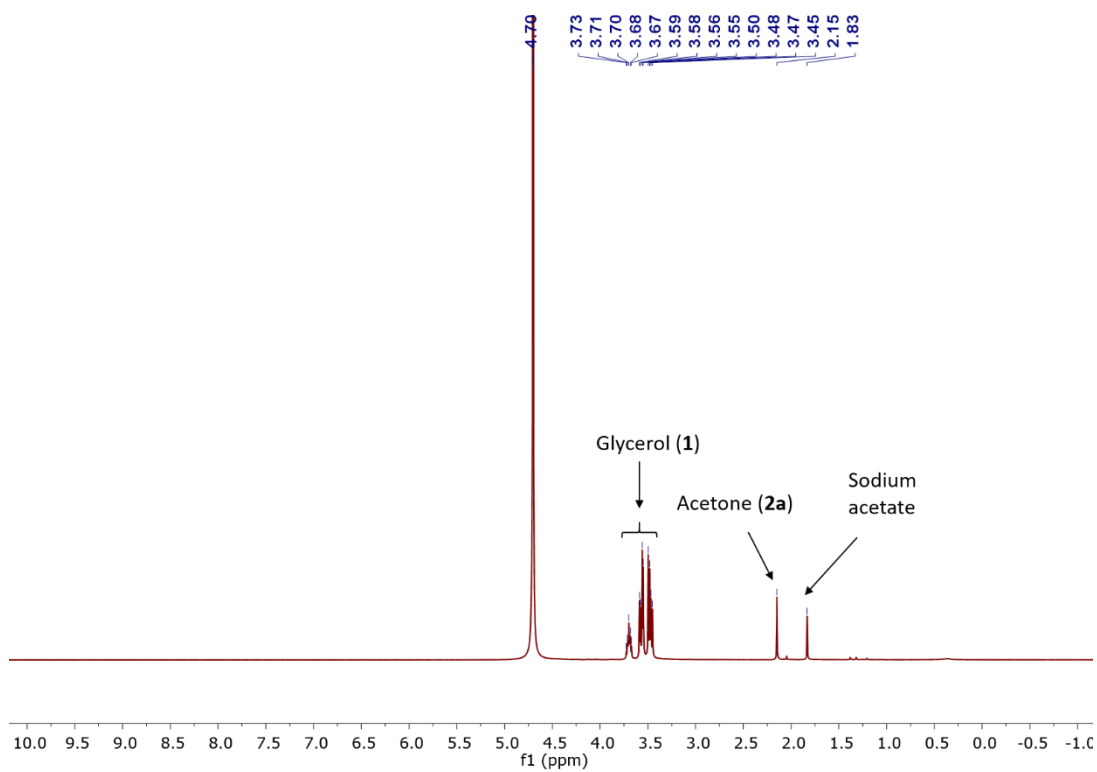

**Figure S36:**  $^1\text{H}$  NMR spectra of glycerol (**1**) transfer dehydrogenation to lactate catalyzed by 0.5 mol% **5b**, in presence of **2a**. (entry 2, Table 2).

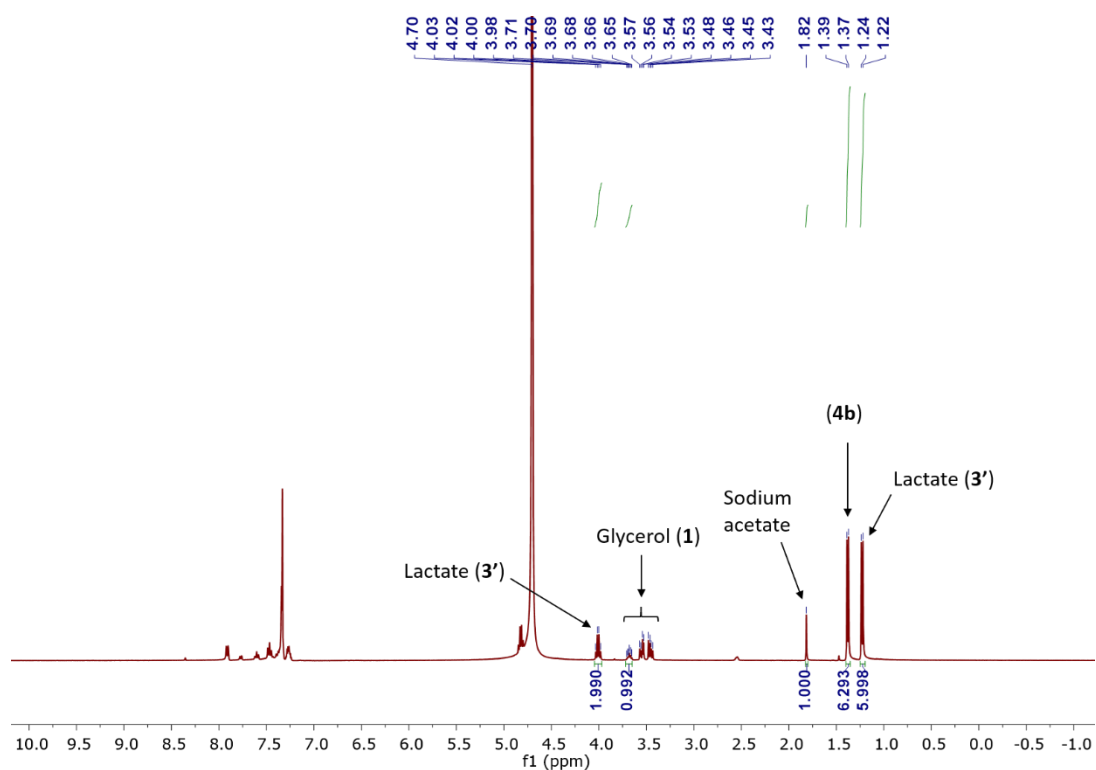

**Figure S37:** <sup>1</sup>H NMR spectra of glycerol (**1**) transfer dehydrogenation to lactate catalyzed by 0.5 mol% **5b**, 1.1 equivalents NaOH, in presence of **2b**. (entry 4, Table 2).

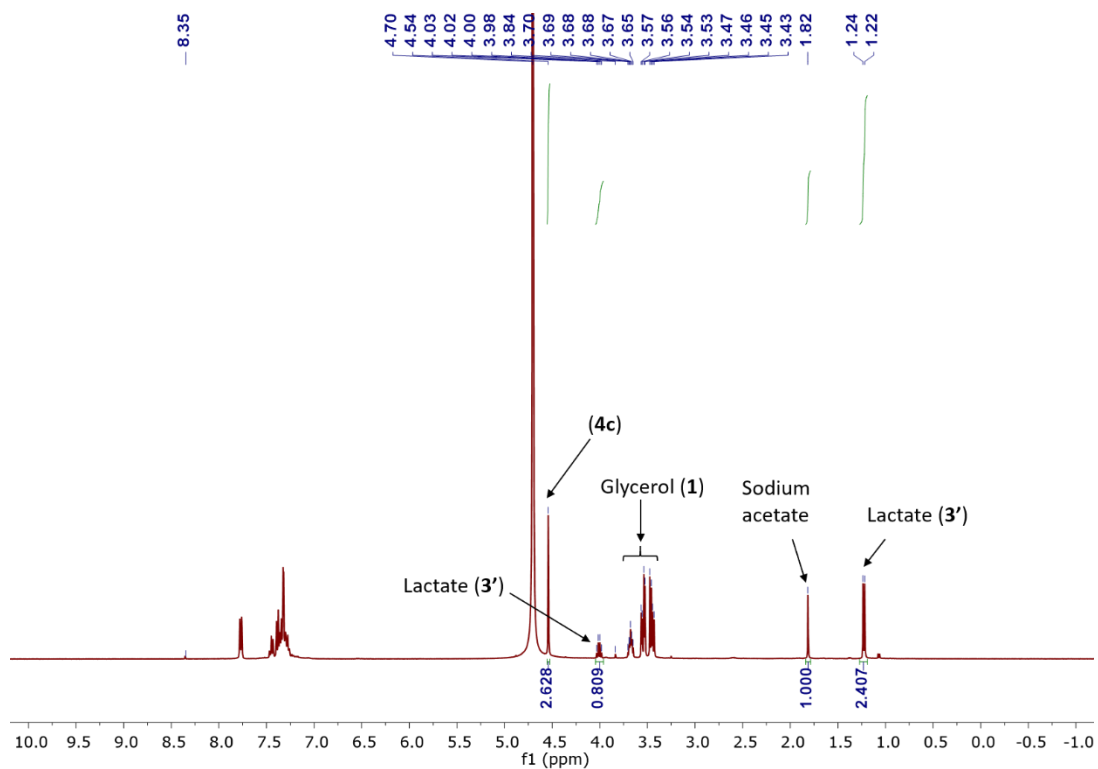

**Figure S38:** <sup>1</sup>H NMR spectra of glycerol (**1**) transfer dehydrogenation to lactate catalyzed by 0.5 mol% **5b**, 1.1 equivalents NaOH, in presence of **2c**. (entry 5, Table 2).

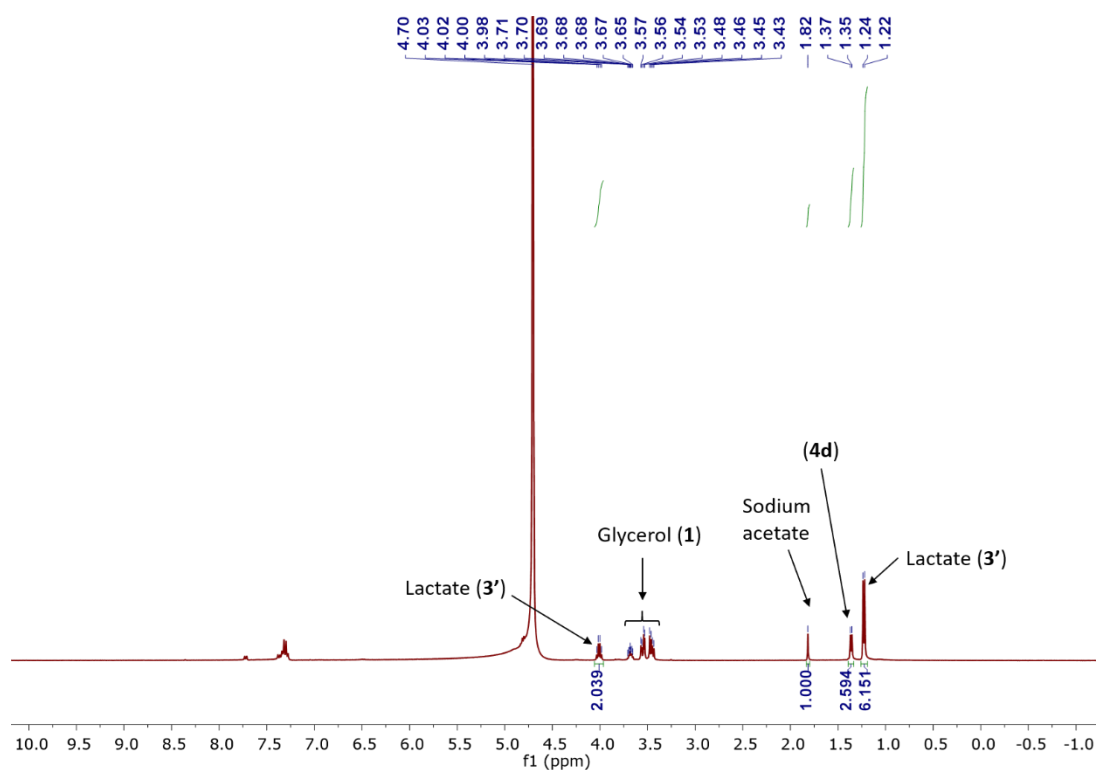

**Figure S39:** <sup>1</sup>H NMR spectra of glycerol (**1**) transfer dehydrogenation to lactate catalyzed by 0.5 mol% **5b**, 1.1 equivalents NaOH, in presence of **2d**. (entry 6, Table 2).

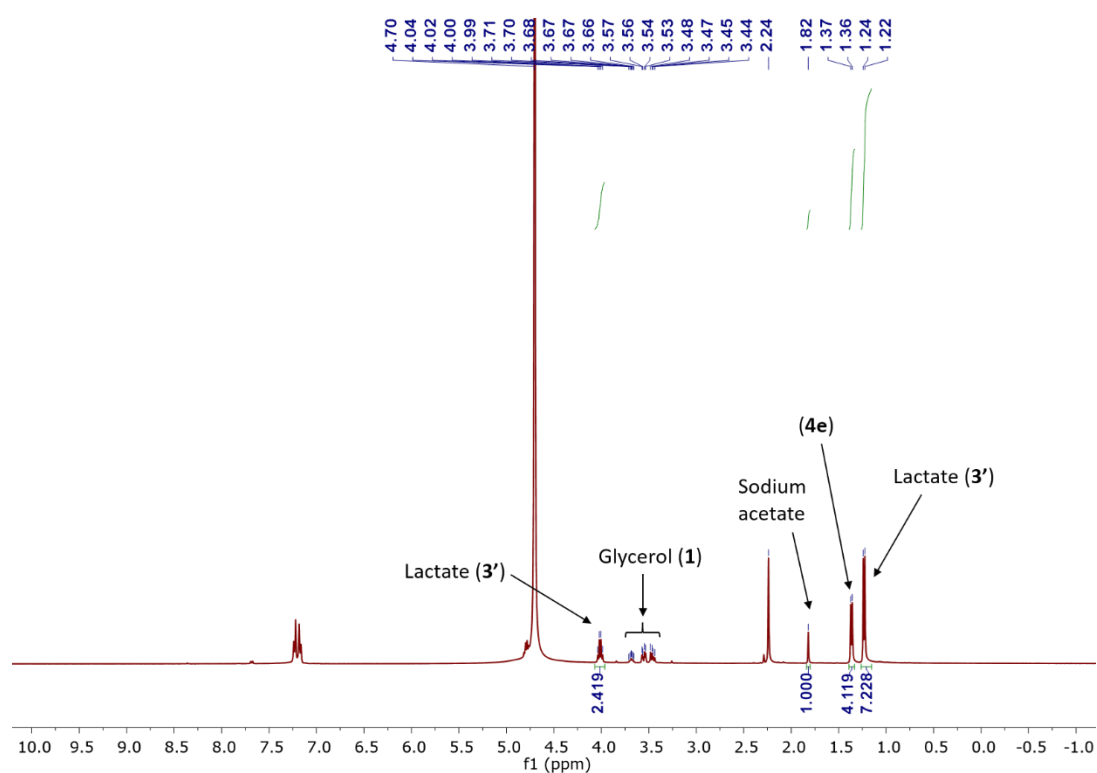

**Figure S40:** <sup>1</sup>H NMR spectra of glycerol (**1**) transfer dehydrogenation to lactate catalyzed by 0.5 mol% **5b**, 1.1 equivalents NaOH, in presence of **2e**. (entry 7, Table 2).

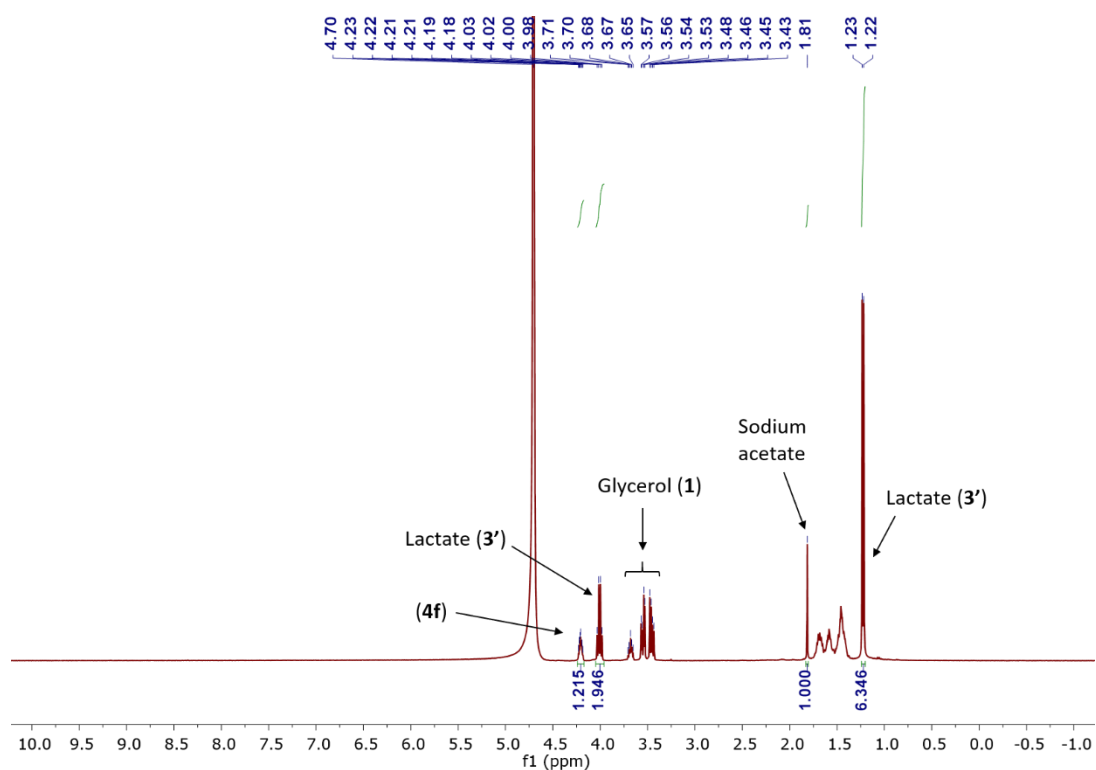

**Figure S41:** <sup>1</sup>H NMR spectra of glycerol (**1**) transfer dehydrogenation to lactate catalyzed by 0.5 mol% **5b**, 1.1 equivalents NaOH, in presence of **2f**. (entry 8, Table 2).

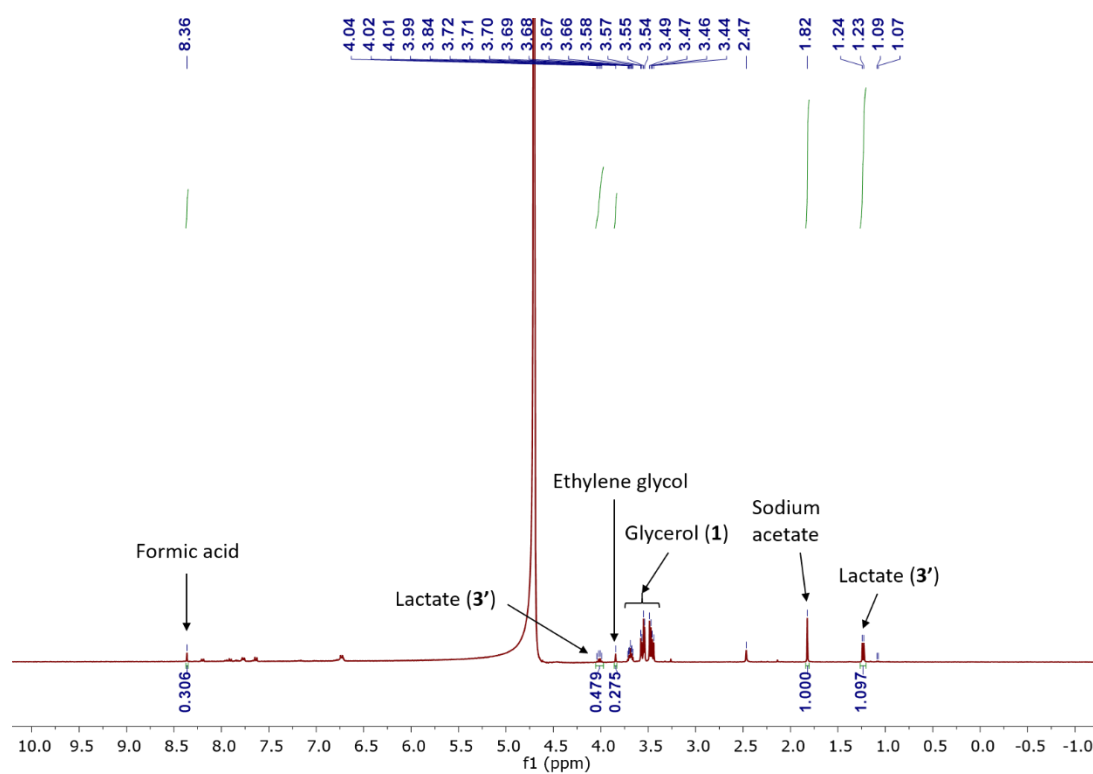

**Figure S42:** <sup>1</sup>H NMR spectra of glycerol (**1**) transfer dehydrogenation to lactate catalyzed by 0.5 mol% **5b**, 1.1 equivalents NaOH, in presence of **2g**. (entry 9, Table 2).

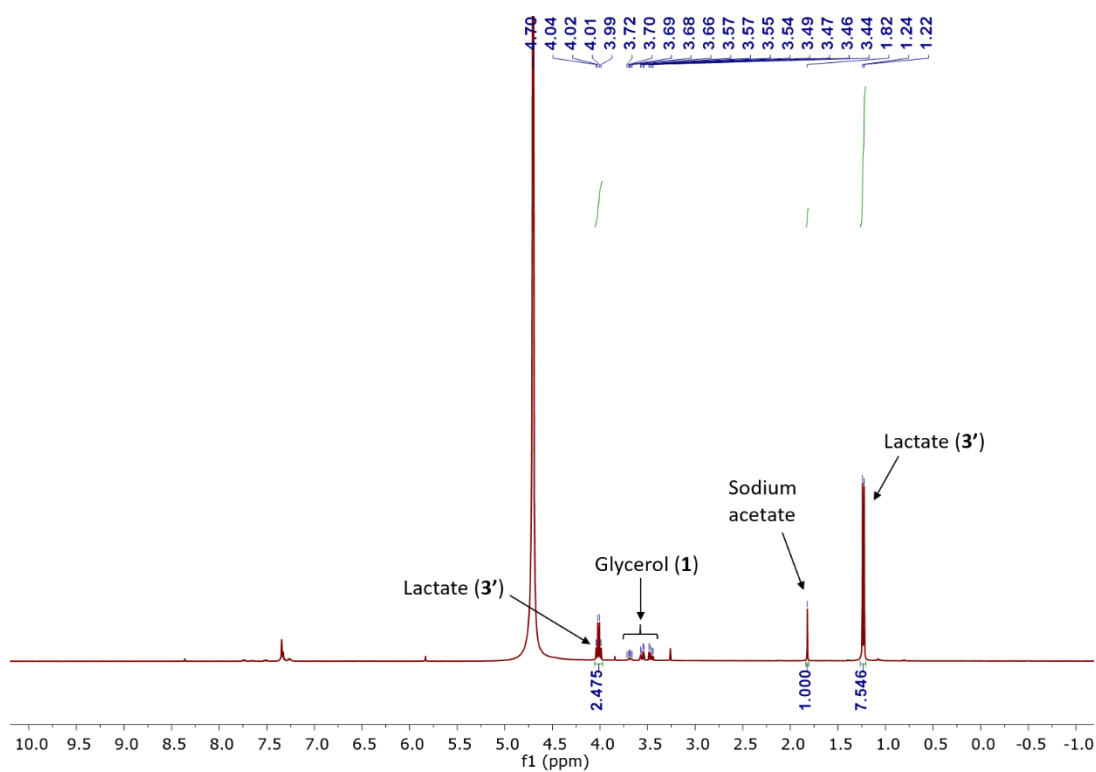

**Figure S43a:** <sup>1</sup>H NMR spectra of glycerol (**1**) transfer dehydrogenation to lactate catalyzed by 0.5 mol% **5b**, 1.1 equivalents NaOH, in presence of **2h** in D<sub>2</sub>O. (entry 10, Table 2).

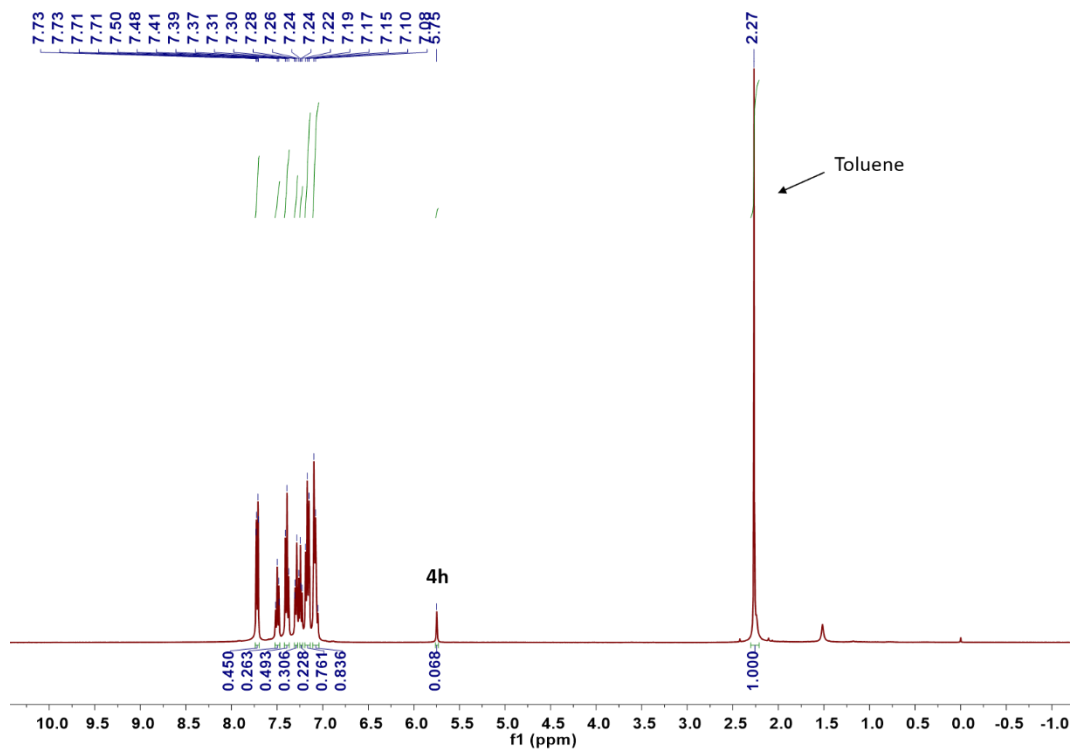

**Figure S43b:** <sup>1</sup>H NMR spectra of glycerol (**1**) transfer dehydrogenation to lactate catalyzed by 0.5 mol% **5b**, 1.1 equivalents NaOH, in presence of **2h** in CDCl<sub>3</sub>. (entry 10, Table 2).



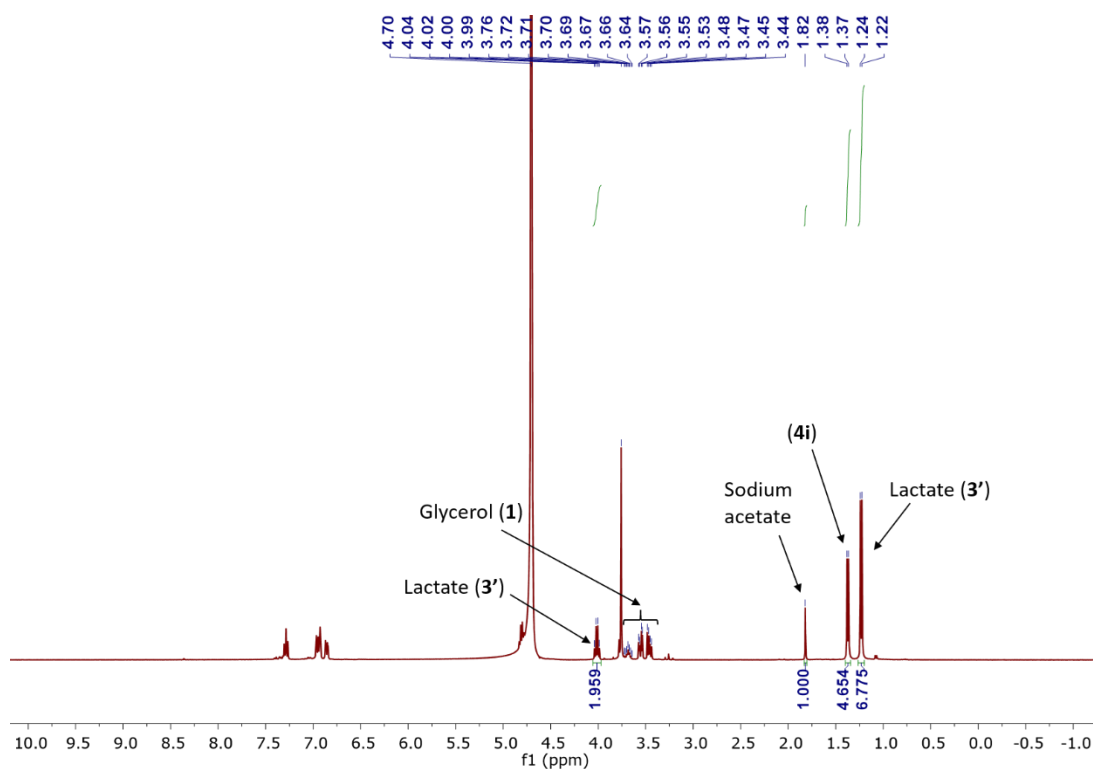

**Figure S44:**  $^1\text{H}$  NMR spectra of glycerol (**1**) transfer dehydrogenation to lactate catalyzed by 0.5 mol% **5b**, 1.1 equivalents NaOH, in presence of **2i**. (entry 11, Table 2).

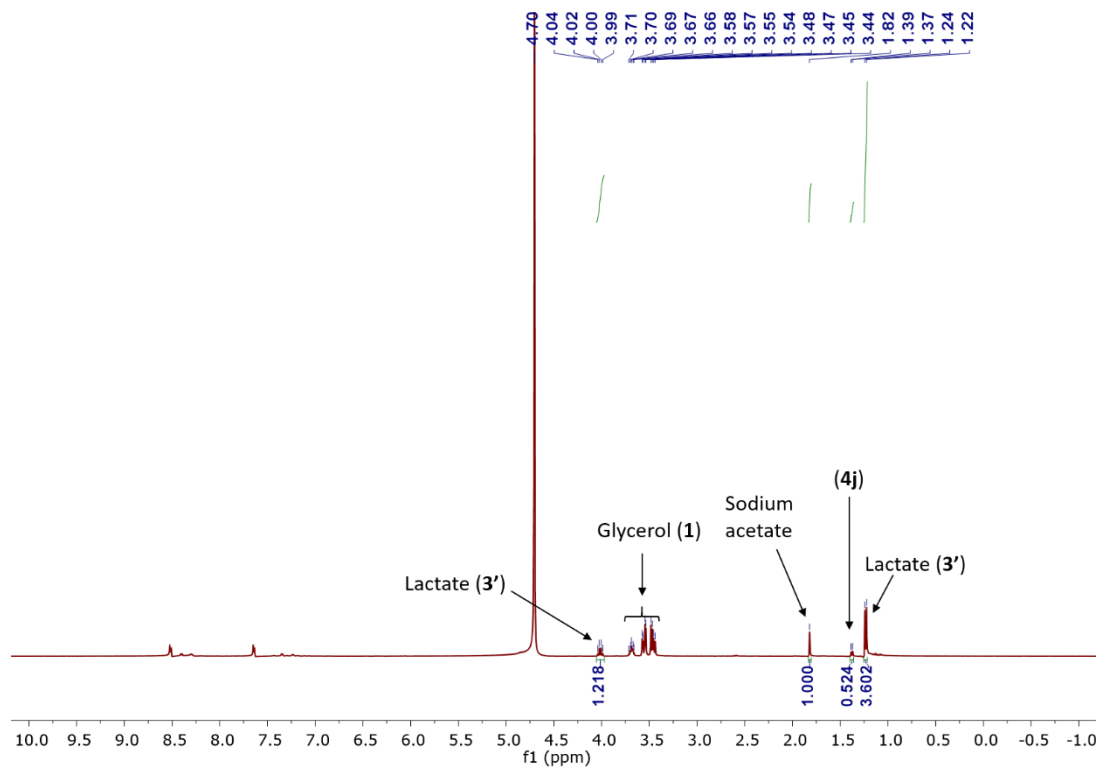

**Figure S45:**  $^1\text{H}$  NMR spectra of glycerol (**1**) transfer dehydrogenation to lactate catalyzed by 0.5 mol% **5b**, 1.1 equivalents NaOH, in presence of **2j**. (entry 12, Table 2).

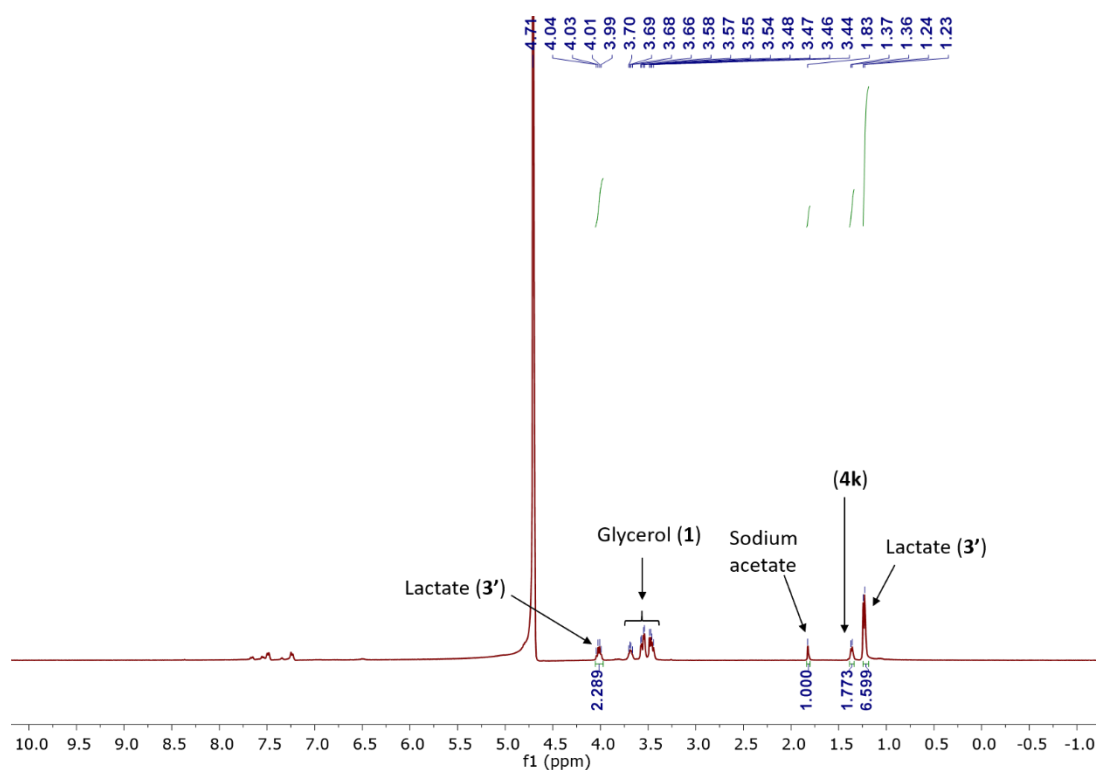

**Figure S46:**  $^1\text{H}$  NMR spectra of glycerol (**1**) transfer dehydrogenation to lactate catalyzed by 0.5 mol% **5b**, 1.1 equivalents NaOH, in presence of **2k**. (entry 13, Table 2).

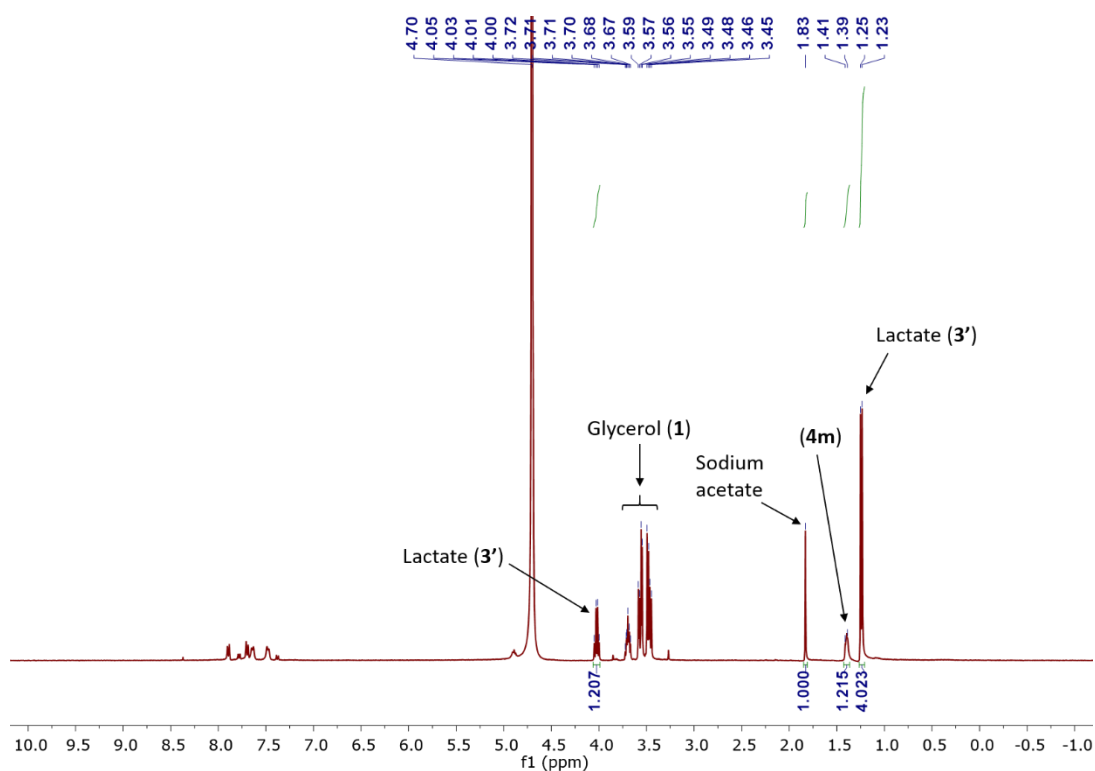

**Figure S47:**  $^1\text{H}$  NMR spectra of glycerol (**1**) transfer dehydrogenation to lactate catalyzed by 0.5 mol% **5b**, 1.1 equivalents NaOH, in presence of **2m**. (entry 15, Table 2).

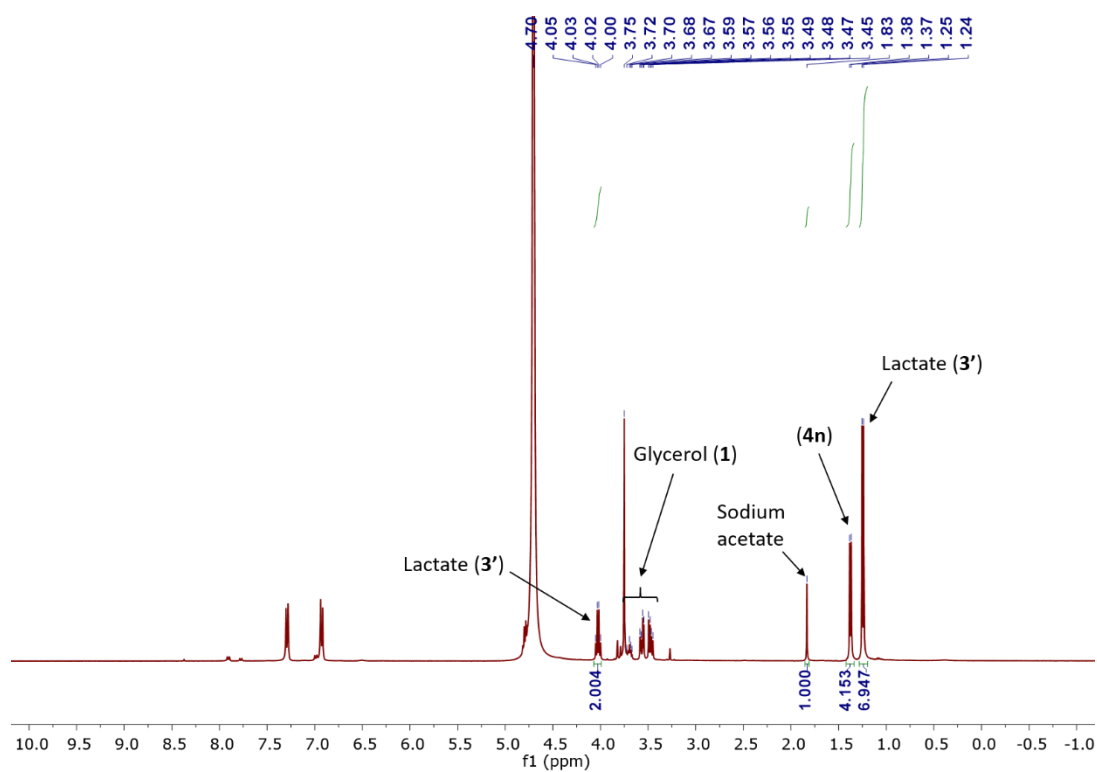

**Figure S48:**  $^1\text{H}$  NMR spectra of glycerol (**1**) transfer dehydrogenation to lactate catalyzed by 0.5 mol% **5b**, 1.1 equivalents NaOH, in presence of **2n**. (entry 16, Table 2).

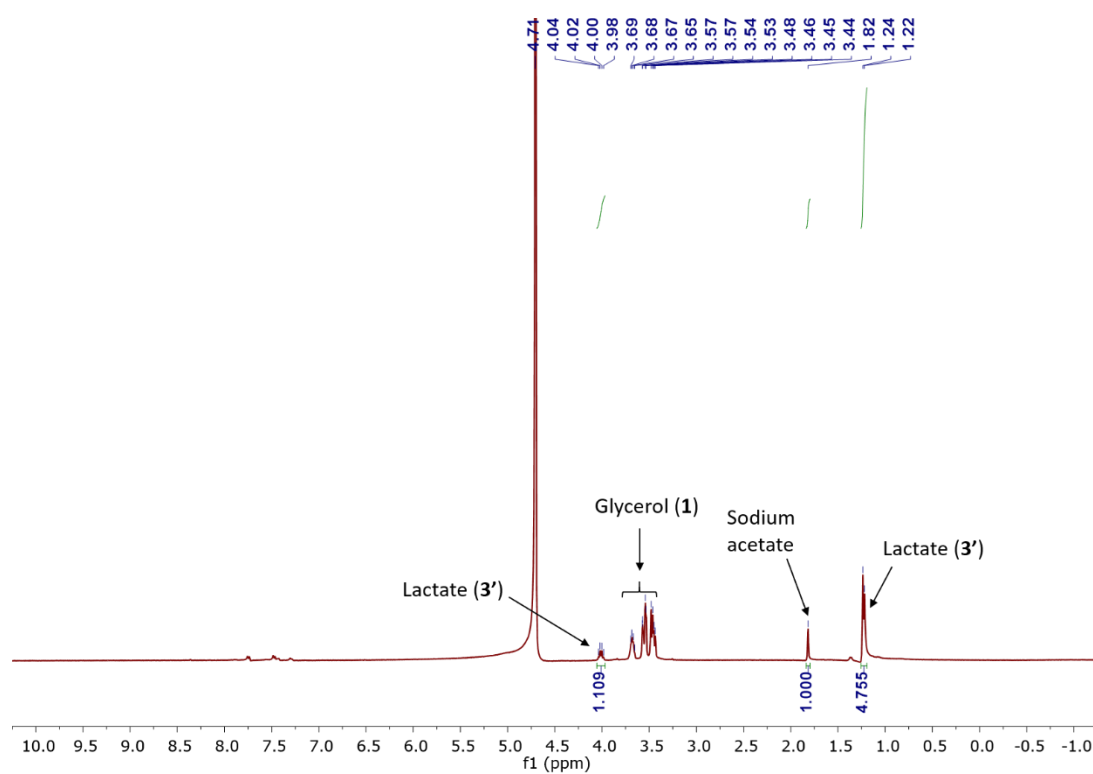

**Figure S49:**  $^1\text{H}$  NMR spectra of glycerol (**1**) transfer dehydrogenation to lactate catalyzed by 0.5 mol% **5b**, 1.1 equivalents NaOH, in presence of **2o**. (entry 17, Table 2).

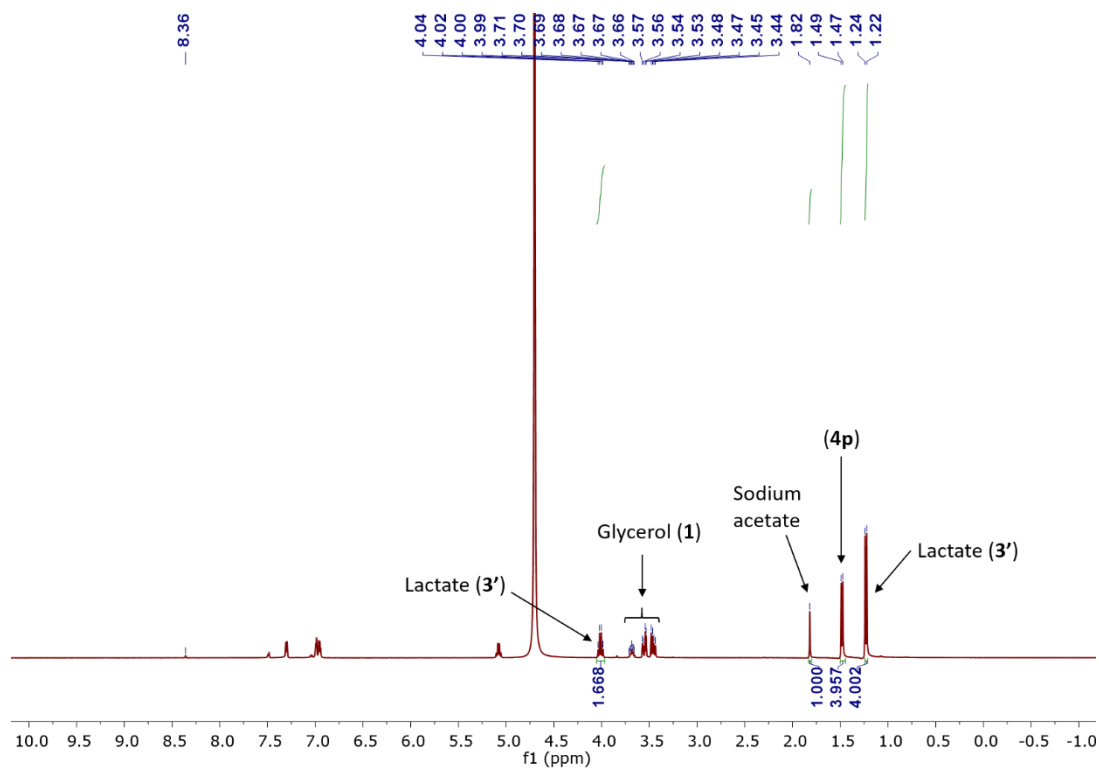

**Figure S50:**  $^1\text{H}$  NMR spectra of glycerol (**1**) transfer dehydrogenation to lactate catalyzed by 0.5 mol% **5b**, 1.1 equivalents NaOH, in presence of **2p**. (entry 18, Table 2).

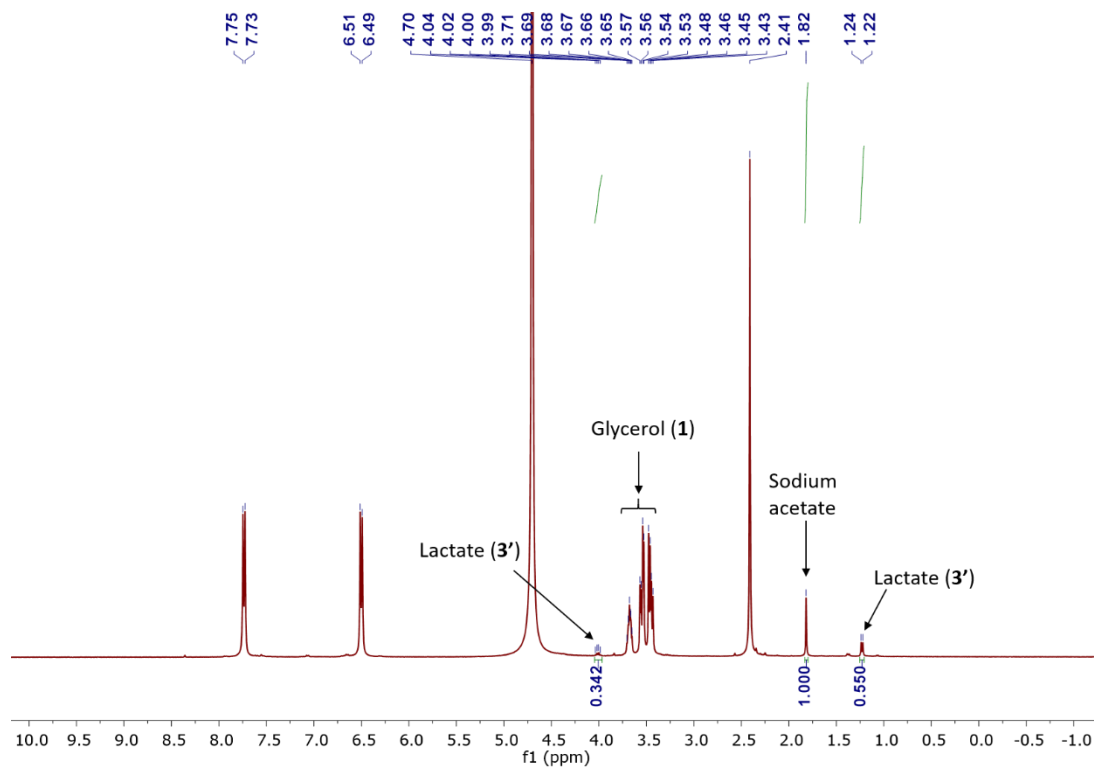

**Figure S51:**  $^1\text{H}$  NMR spectra of glycerol (**1**) transfer dehydrogenation to lactate catalyzed by 0.5 mol% **5b**, 1.1 equivalents NaOH, in presence of **2q**. (entry 19, Table 2).

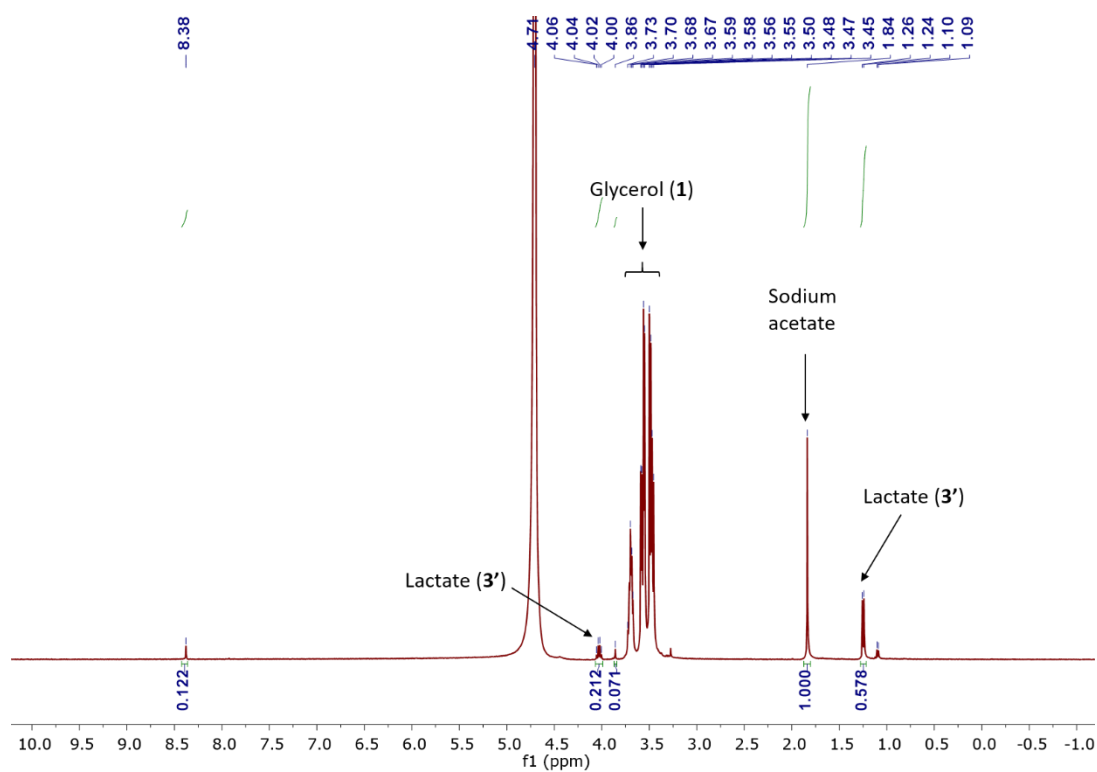

**Figure S52:**  $^1\text{H}$  NMR spectra of glycerol (**1**) transfer dehydrogenation to lactate catalyzed by 0.5 mol% **5b**, 1.1 equivalents NaOH, in absence of any acceptor. (entry 20, Table 2).

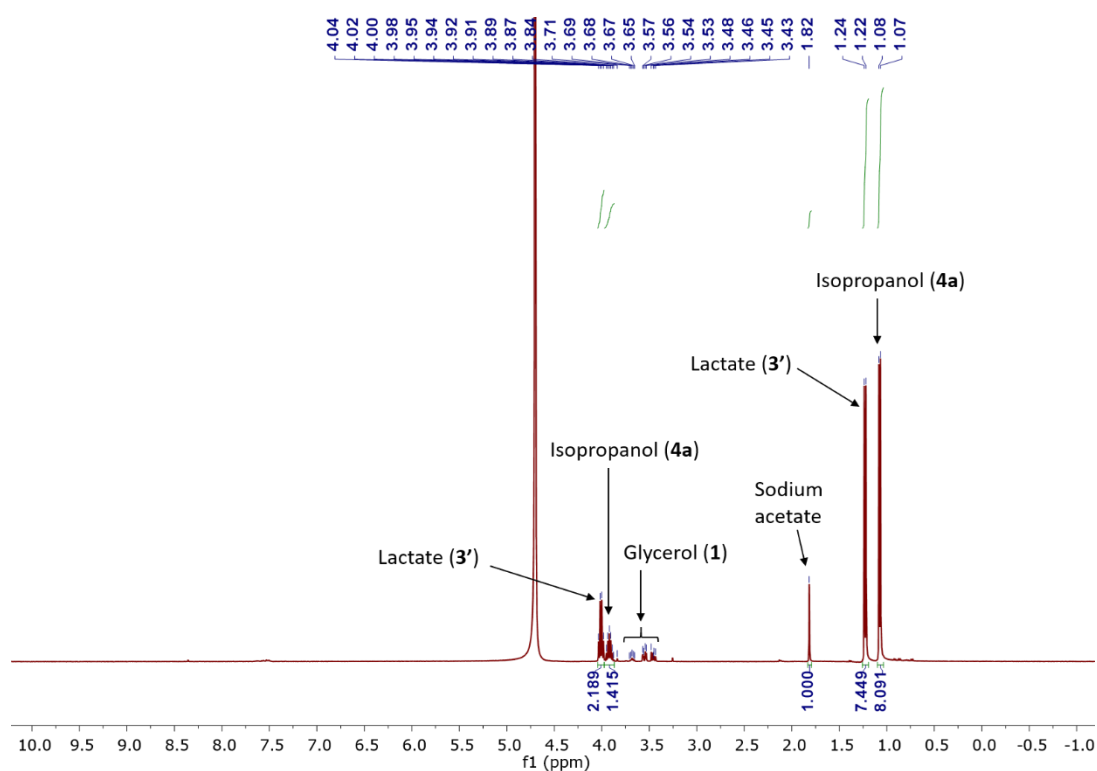

**Figure S53:**  $^1\text{H}$  NMR spectra of glycerol (**1**) transfer dehydrogenation to lactate catalyzed by 0.5 mol%  $\text{CrCl}_3 \cdot 6\text{H}_2\text{O}$ , 1.1 equivalents NaOH, in presence of 5 mol%  $\text{PPh}_3$ . (equation 3, Scheme 1).

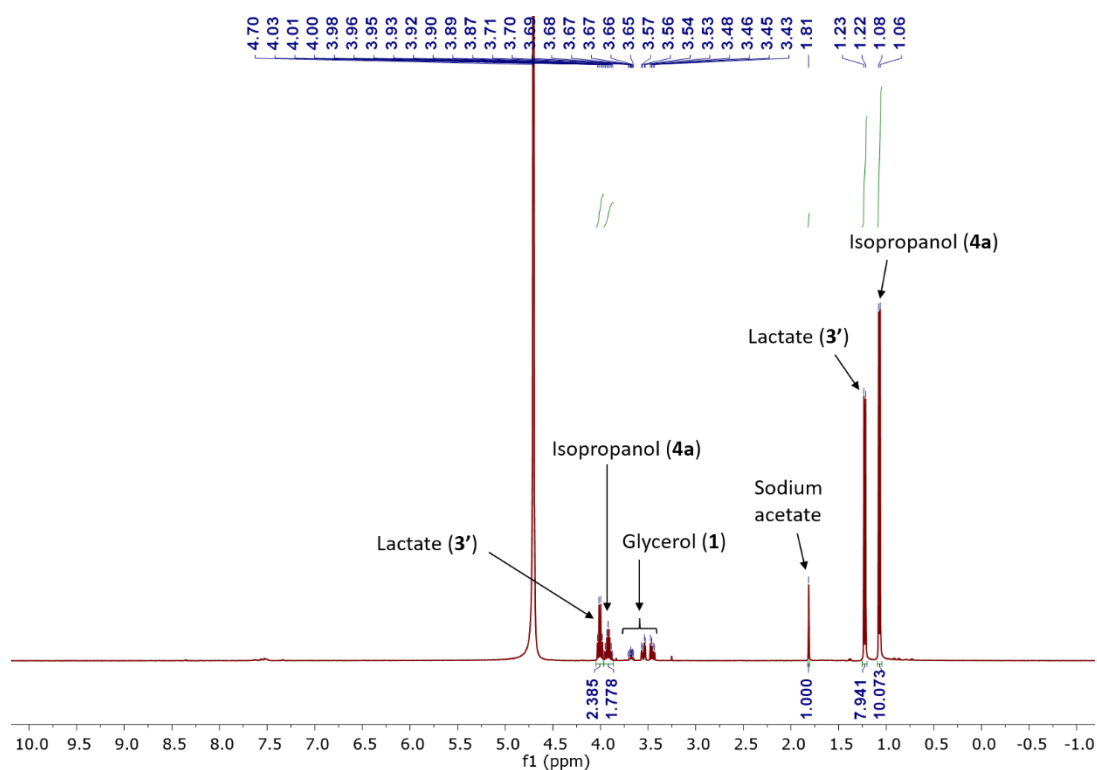

**Figure S54:** <sup>1</sup>H NMR spectra of glycerol (**1**) transfer dehydrogenation to lactate catalyzed by 0.5 mol% **5b**, 1.1 equivalents NaOH, in presence of 5 mol% PPh<sub>3</sub>. (equation 4, Scheme 1).

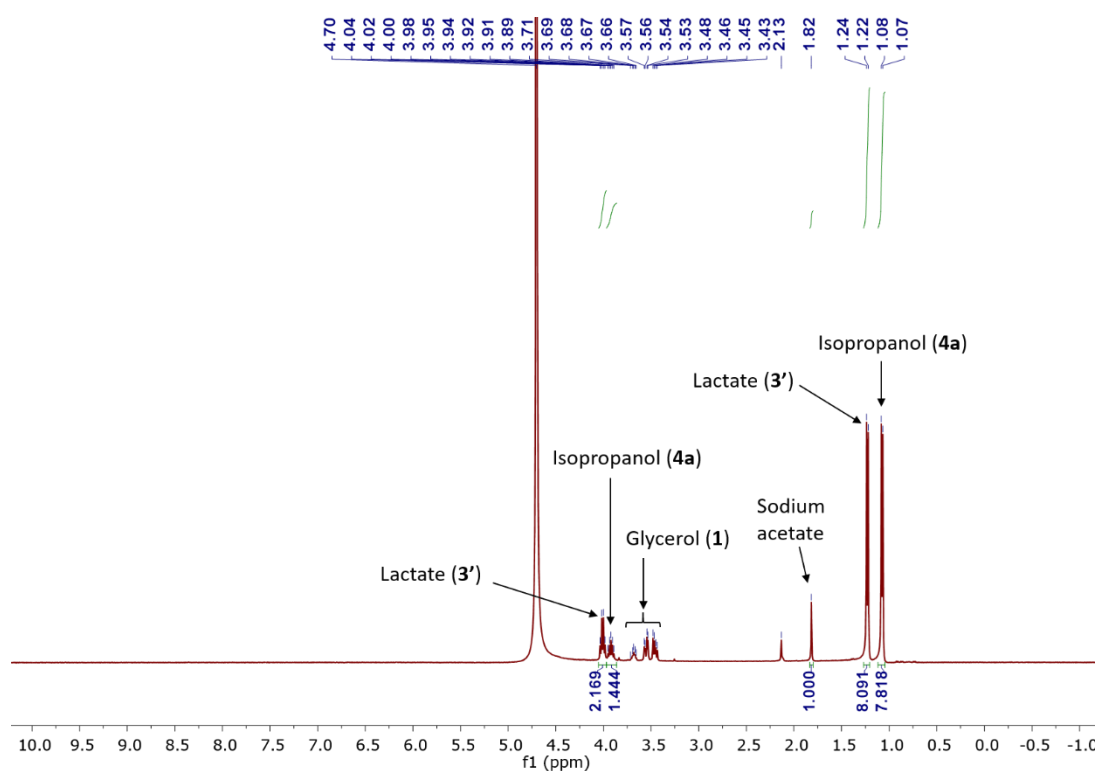

**Figure S55:** <sup>1</sup>H NMR spectra of glycerol (**1**) transfer dehydrogenation to lactate catalyzed by 0.5 mol% CrCl<sub>3</sub>·6H<sub>2</sub>O, 1.1 equivalents NaOH, in presence of 5 mol% CS<sub>2</sub>. (equation 5, Scheme 1).

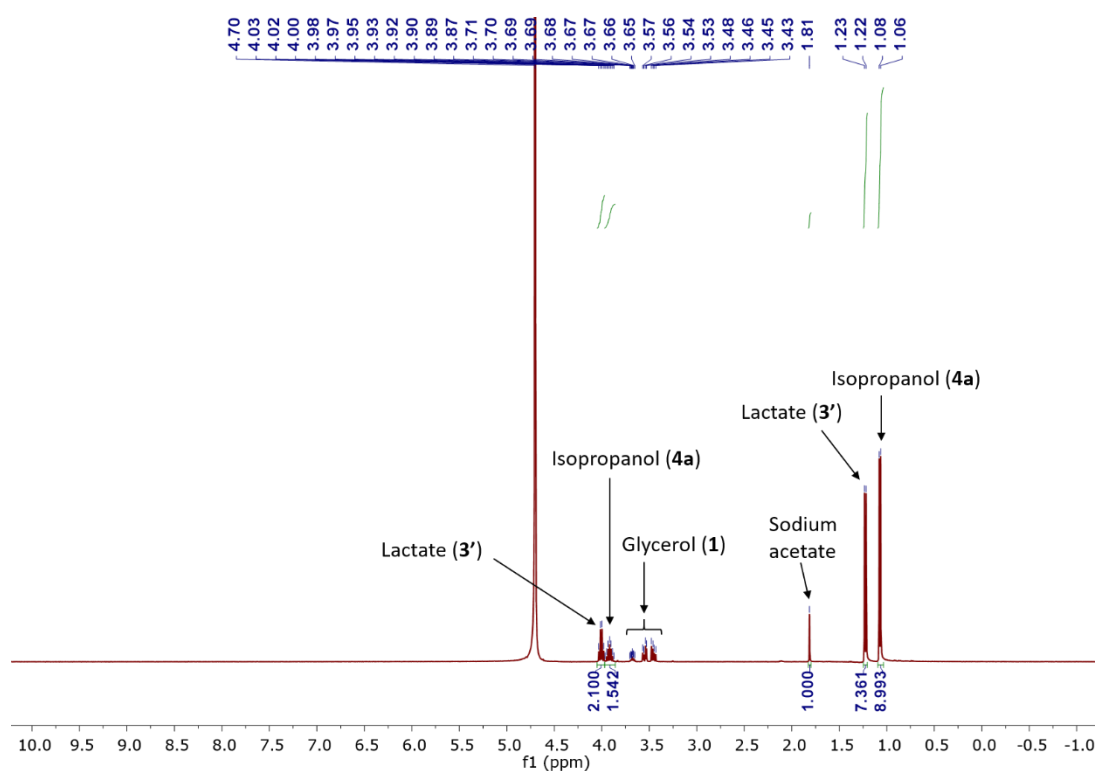

**Figure S56:** <sup>1</sup>H NMR spectra of glycerol (**1**) transfer dehydrogenation to lactate catalyzed by 0.5 mol% **5b**, 1.1 equivalents NaOH, in presence of 5 mol% CS<sub>2</sub>. (equation 6, Scheme 1).

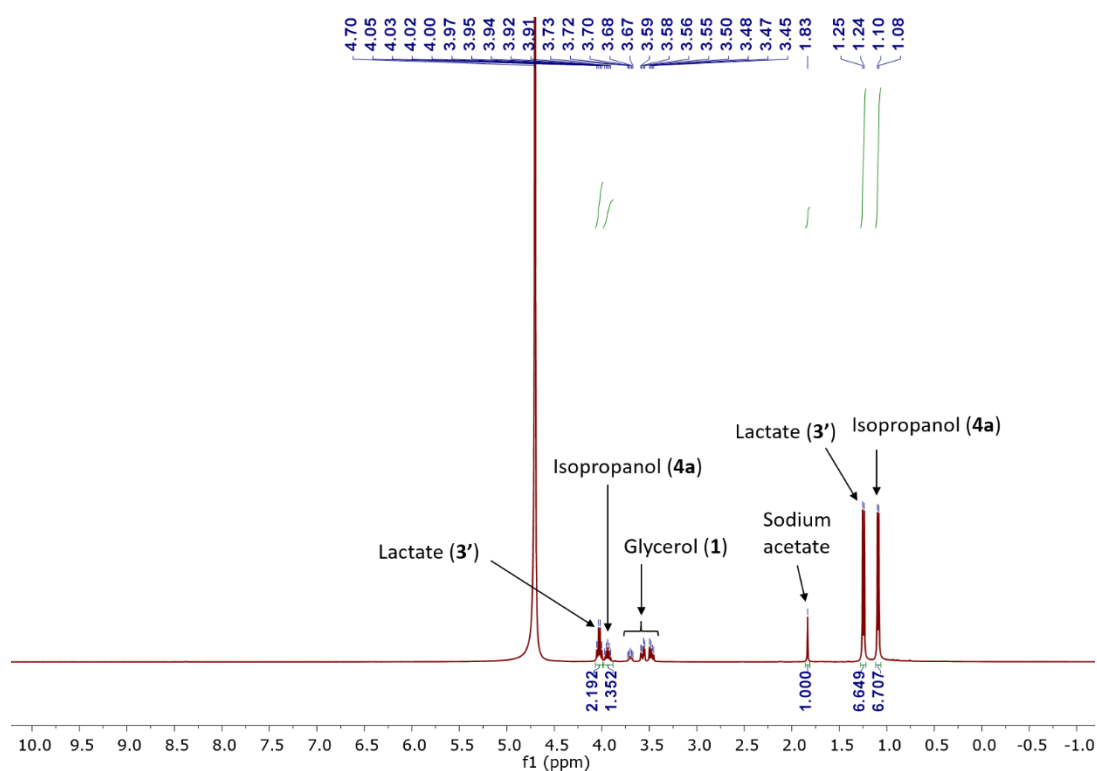

**Figure S57:** <sup>1</sup>H NMR spectra of glycerol (**1**) transfer dehydrogenation to lactate catalyzed by 0.5 mol% **5b**, 1.1 equivalents NaOH, in presence of Hg (excess). (equation 7, Scheme 1).

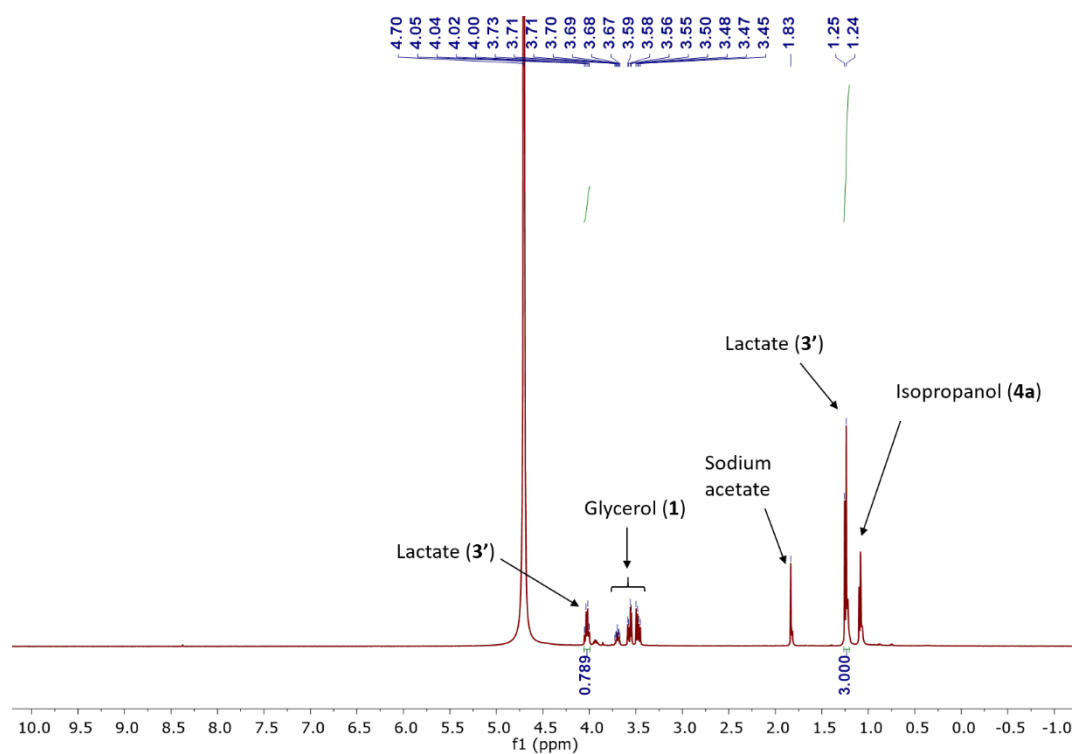

**Figure S58a:** <sup>1</sup>H NMR spectra of a mixture of glycerol (**1**) and glycerol-D8 (**1c**) transfer dehydrogenation to lactate catalyzed by 0.5 mol% **5b**, 1.1 equivalents NaOH. (equation 10, Scheme 1).

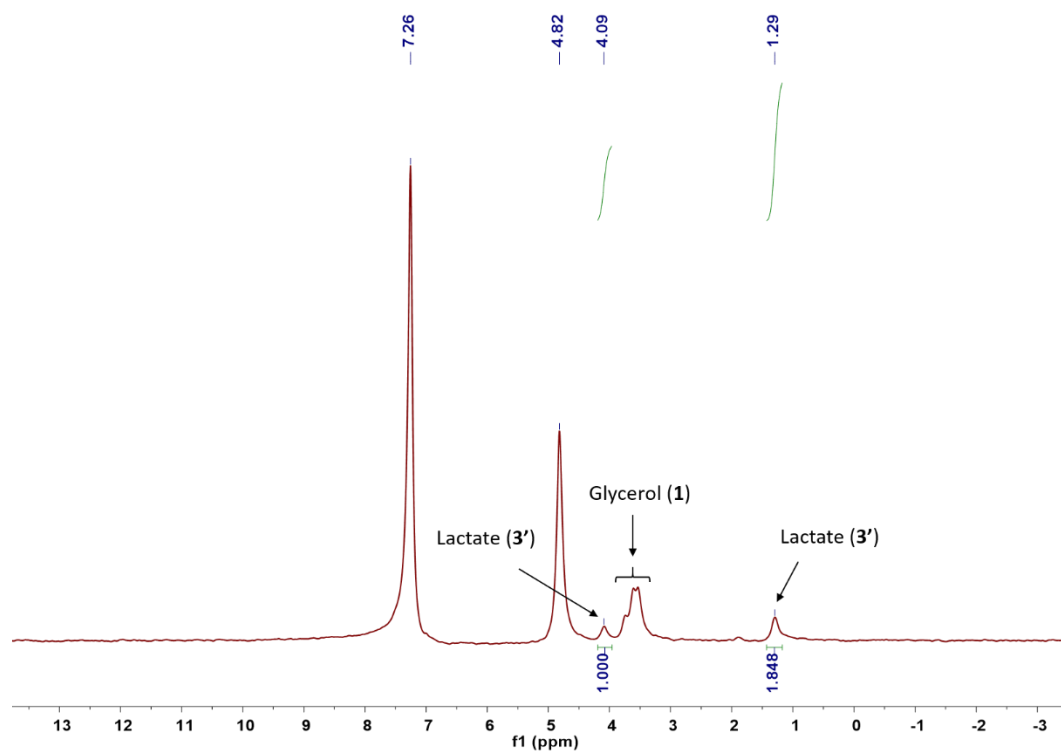

**Figure S58b:** <sup>2</sup>H NMR spectra of a mixture of glycerol (**1**) and glycerol-D8 (**1c**) transfer dehydrogenation to lactate catalyzed by 0.5 mol% **5b**, 1.1 equivalents NaOH, in water using CDCl<sub>3</sub> lock. (equation 10, Scheme 1).



## 5. Kinetic study

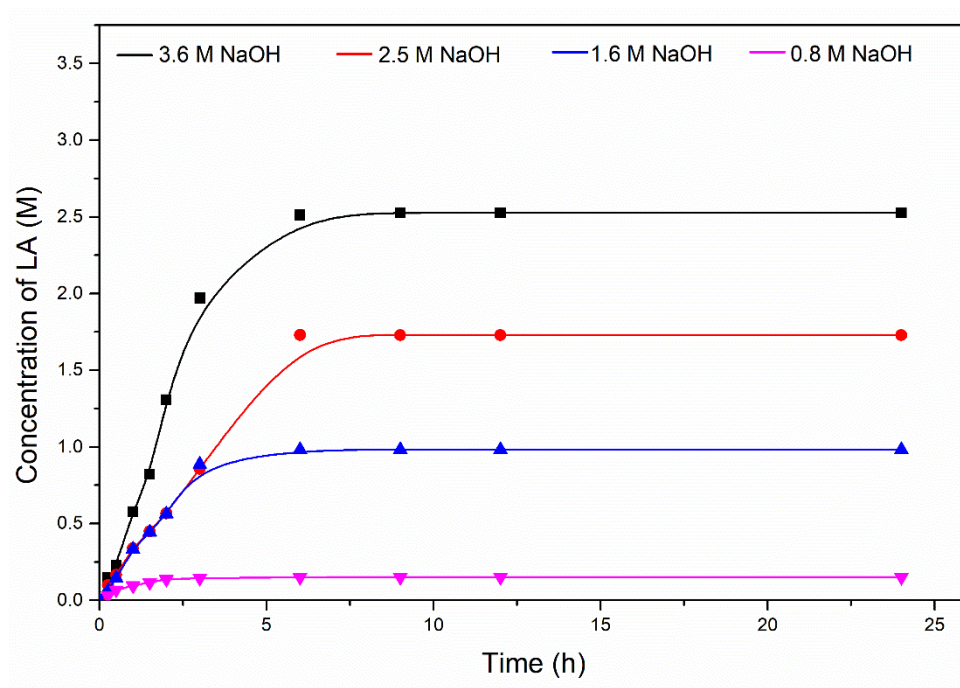

**Figure S59.** Time-profile of transfer dehydrogenation of glycerol in open vessel using glycerol (0.460 g, 5 mmol, 3.3 M), **5b** (0.0114 g, 0.025 mmol, 0.016 M), acetophenone (1.2 g, 10 mmol, 6.6 M), at 160 °C, in presence of NaOH (0.05-0.22 g, 1.25-5.5 mmol, 0.8-3.6 M).
